# Supplementary material for: Peptide/β-Peptoid Hybrids with Ultrashort PEG-Like Moieties: Effects on Hydrophobicity, Antibacterial Activity and Hemolytic Properties
Source: MDPI journal article supplement (doi:10.3390/ijms22137041), 2021-06-30

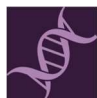

*Supplementary Material*

# Peptide/ $\beta$ -Peptoid Hybrids with Ultrashort PEG-Like Moieties: Effects on Hydrophobicity, Antibacterial Activity and Hemolytic Properties

Nicki Frederiksen <sup>1</sup>, Stavroula Louka <sup>1</sup>, Chirag Mudaliar <sup>1</sup>, Ilona Domraceva <sup>2</sup>, Agrita Kreicberga <sup>2</sup>, Osvalds Pugovics <sup>2</sup>, Dorota Żabicka <sup>3</sup>, Magdalena Tomczak <sup>3</sup>, Weronika Wygoda <sup>3</sup>, Fredrik Björkling <sup>1</sup> and Henrik Franzyk <sup>1,\*</sup>

<sup>1</sup> Center for Peptide-Based Antibiotics, Department of Drug Design and Pharmacology, Faculty of Health and Medical Sciences, University of Copenhagen, DK-2100 Copenhagen, Denmark; nicki.frederiksen@sund.ku.dk (N.F.); stavroulaloukad@gmail.com (S.L.); chiragmudaliar@gmail.com (C.M.); fb@sund.ku.dk (F.B.)

<sup>2</sup> Latvian Institute of Organic Synthesis, Aizkraukles 21, 1006 Riga, Latvia; ilona@farm.osi.lv (I.D.); agrita.kreicberga@osi.lv (A.K.); osvalds@osi.lv (O.P.)

<sup>3</sup> Department of Epidemiology and Clinical Microbiology, National Medicines Institute, ul. Chełmska 30/34, 00-725 Warsaw, Poland; d.zabicka@nil.gov.pl (D.Ż.); mtomczak@cls.edu.pl (M.T.); w.wygoda@nil.gov.pl (W.W.)

\* Correspondence: henrik.franzyk@sund.ku.dk

## Contents

|    |                                     |
|----|-------------------------------------|
| 2  | Estimation of log D values          |
| 3  | Calculation of log D values         |
| 4  | Characterization of peptidomimetics |
| 22 | HepG2 IC <sub>50</sub> curves       |

## Estimation of log D values

**Table S1.** Log  $D_{\max}$  values and selected ion recording parameters of compounds.

| Compound  | log $D_{\max}$ | m/z   |       |       |
|-----------|----------------|-------|-------|-------|
|           |                | z = 6 | z = 5 | z = 4 |
| <b>1</b>  | <−2.662        | 373.3 | 466.3 | 621.4 |
| <b>7</b>  | <−3.650        | 402.3 | 502.6 | 669.8 |
| <b>9</b>  | <−3.627        | 352.5 | 422.7 | 527.2 |
| <b>10</b> | <−2.994        | 367.1 | 440.4 | 550.2 |
| <b>11</b> | <−2.876        | 361.8 | 433.9 | 542.1 |
| <b>12</b> | <−3.147        | 383.8 | 460.4 | 575.2 |
| <b>13</b> | <−3.911        | 405.8 | 486.8 | 608.3 |
| <b>14</b> | <−2.883        | 434.9 | 521.7 | 651.9 |
| <b>15</b> | <−3.180        | 345.0 | 413.7 | 516.9 |
| <b>16</b> | <−3.922        | 359.5 | 431.2 | 538.8 |

## Calculation of log D values

Table S2. Calculated log D values of compounds.

| Subgroup | Cmpd | Sequence <sup>1</sup>                                                               | %MeCN <sup>2</sup> | cLogD <sub>7.4</sub> <sup>3</sup> |
|----------|------|-------------------------------------------------------------------------------------|--------------------|-----------------------------------|
| I        | 1    | H-[X] <sub>6</sub> -NH <sub>2</sub>                                                 | 41.6               | -14.22                            |
|          | 2    | H-sPEG2-[X] <sub>6</sub> -NH <sub>2</sub>                                           | 41.4               | -16.22                            |
|          | 3    | H-sPEG4-[X] <sub>6</sub> -NH <sub>2</sub>                                           | 41.9               | -16.08                            |
| II       | 4    | H-sPEG2-[X] <sub>6</sub> -sPEG2-NH <sub>2</sub>                                     | 41.3               | -17.42                            |
|          | 5    | H-sPEG4-[X] <sub>6</sub> -sPEG4-NH <sub>2</sub>                                     | 42.2               | -17.13                            |
| III      | 6    | H-[X] <sub>3</sub> -sPEG1-[X] <sub>3</sub> -NH <sub>2</sub>                         | 41.2               | -15.37                            |
|          | 7    | H-[X] <sub>3</sub> -sPEG2-[X] <sub>3</sub> -NH <sub>2</sub>                         | 41.4               | -15.41                            |
|          | 8    | H-[X] <sub>3</sub> -sPEG3-[X] <sub>3</sub> -NH <sub>2</sub>                         | 41.7               | -15.46                            |
|          | 9    | H-[X] <sub>3</sub> -sPEG4-[X] <sub>3</sub> -NH <sub>2</sub>                         | 41.8               | -15.27                            |
|          | 10   | H-[X] <sub>3</sub> -sPEG6-[X] <sub>3</sub> -NH <sub>2</sub>                         | 42.3               | -15.37                            |
| IV       | 11   | H-sPEG1-[X] <sub>3</sub> -sPEG1-[X] <sub>3</sub> -sPEG1-NH <sub>2</sub>             | 40.8               | -18.20                            |
|          | 12   | H-sPEG2-[X] <sub>3</sub> -sPEG2-[X] <sub>3</sub> -sPEG2-NH <sub>2</sub>             | 41.3               | -18.62                            |
|          | 13   | H-sPEG3-[X] <sub>3</sub> -sPEG3-[X] <sub>3</sub> -sPEG3-NH <sub>2</sub>             | 41.9               | -18.76                            |
|          | 14   | H-sPEG4-[X] <sub>3</sub> -sPEG4-[X] <sub>3</sub> -sPEG4-NH <sub>2</sub>             | 42.4               | -18.19                            |
| V        | 15   | H-[X] <sub>2</sub> -sPEG1-[X] <sub>2</sub> -sPEG1-[X] <sub>2</sub> -NH <sub>2</sub> | 41.1               | -16.52                            |
|          | 16   | H-[X] <sub>2</sub> -sPEG2-[X] <sub>2</sub> -sPEG2-[X] <sub>2</sub> -NH <sub>2</sub> | 41.5               | -16.61                            |
|          | 17   | H-[X] <sub>2</sub> -sPEG3-[X] <sub>2</sub> -sPEG3-[X] <sub>2</sub> -NH <sub>2</sub> | 41.8               | -16.71                            |
|          | 18   | H-[X] <sub>2</sub> -sPEG4-[X] <sub>2</sub> -sPEG4-[X] <sub>2</sub> -NH <sub>2</sub> | 42.1               | -16.33                            |

<sup>1</sup> X = Lys-βNPhe(4-F). <sup>2</sup> Experimental relative hydrophobicity measured as % MeCN at peak elution. RP-HPLC gradient: 0 → 60% B during 15 min. For column specifications, see **Error! Reference source not found.** <sup>3</sup> cLogD<sub>7.4</sub> = calculated distribution coefficient at pH 7.4.

## Characterization of peptidomimetics

### Compound 1

**HRMS:** calculated for  $[M+H]^+$  1862.05481, found 1862.05565;  $\Delta M = 0.5$  ppm.

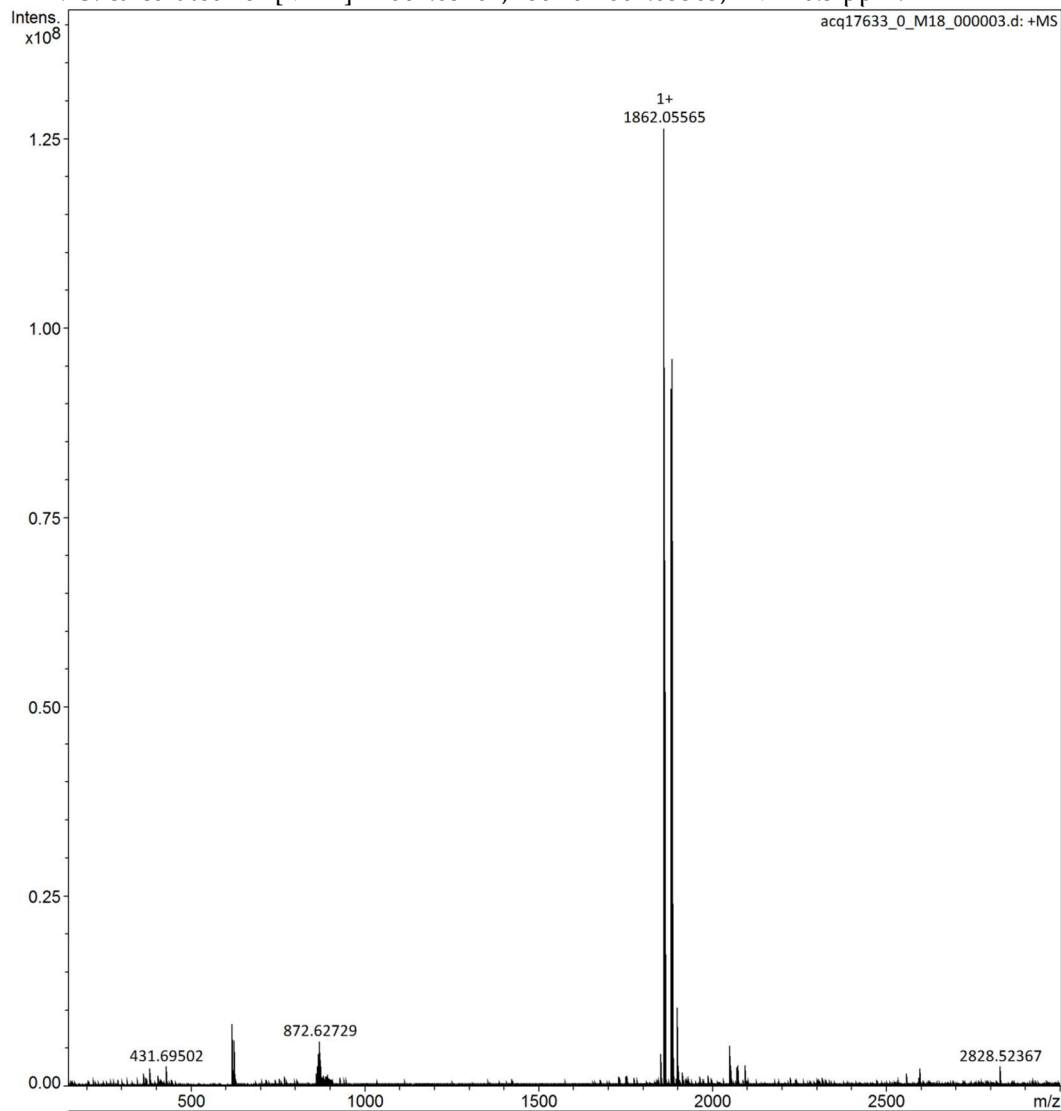

**HPLC:** Charge: +7.  $t_R = 6.534$  min, purity 98.131%. Gradient: 0-60% B during 10 min. B = 95% MeCN + 0.1% TFA.

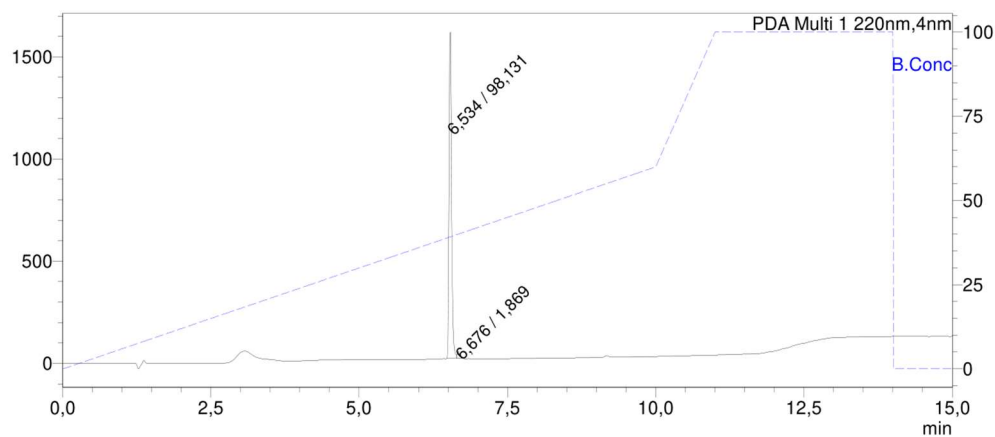

## Compound 2

**HRMS:** calculated for  $[M+H]^+$  2007.12870, found 2007.12894;  $\Delta M = 0.1$  ppm.

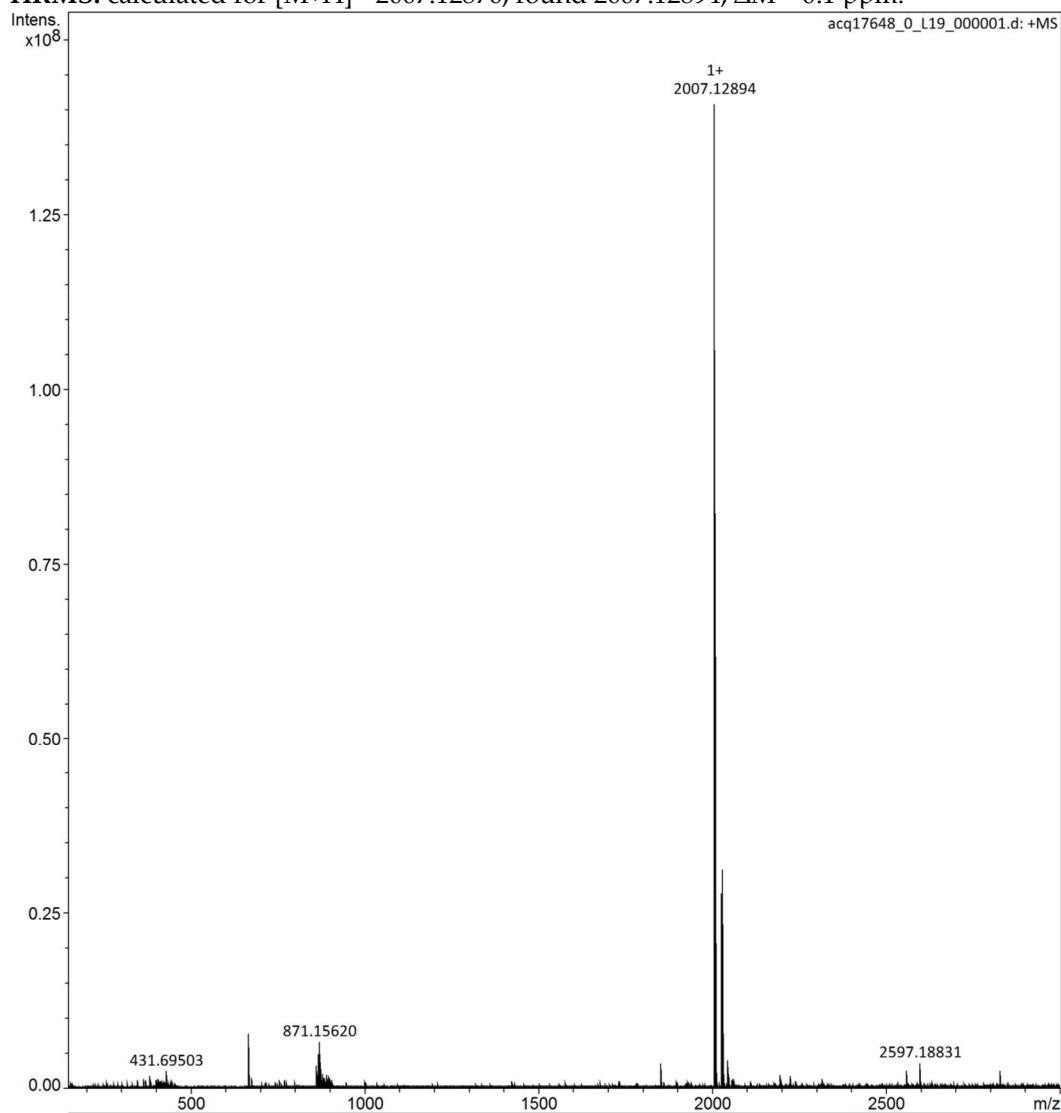

**HPLC:** Charge: +7.  $t_R = 6.524$  min, purity 99.102%. Gradient: 0–60% B during 10 min. B = 95% MeCN + 0.1% TFA.

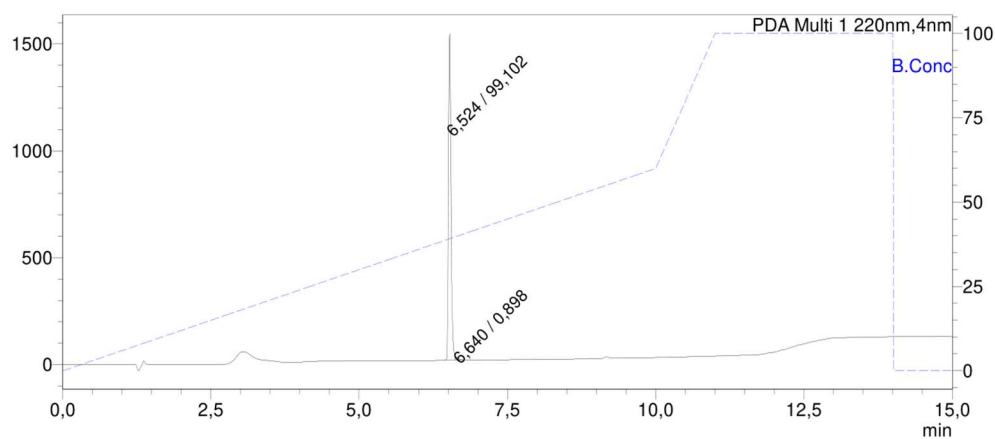

### Compound 3

**HRMS:** calculated for  $[M+H]^+$  2109.19678, found 2109.19714Y;  $\Delta M = 0.2$  ppm.

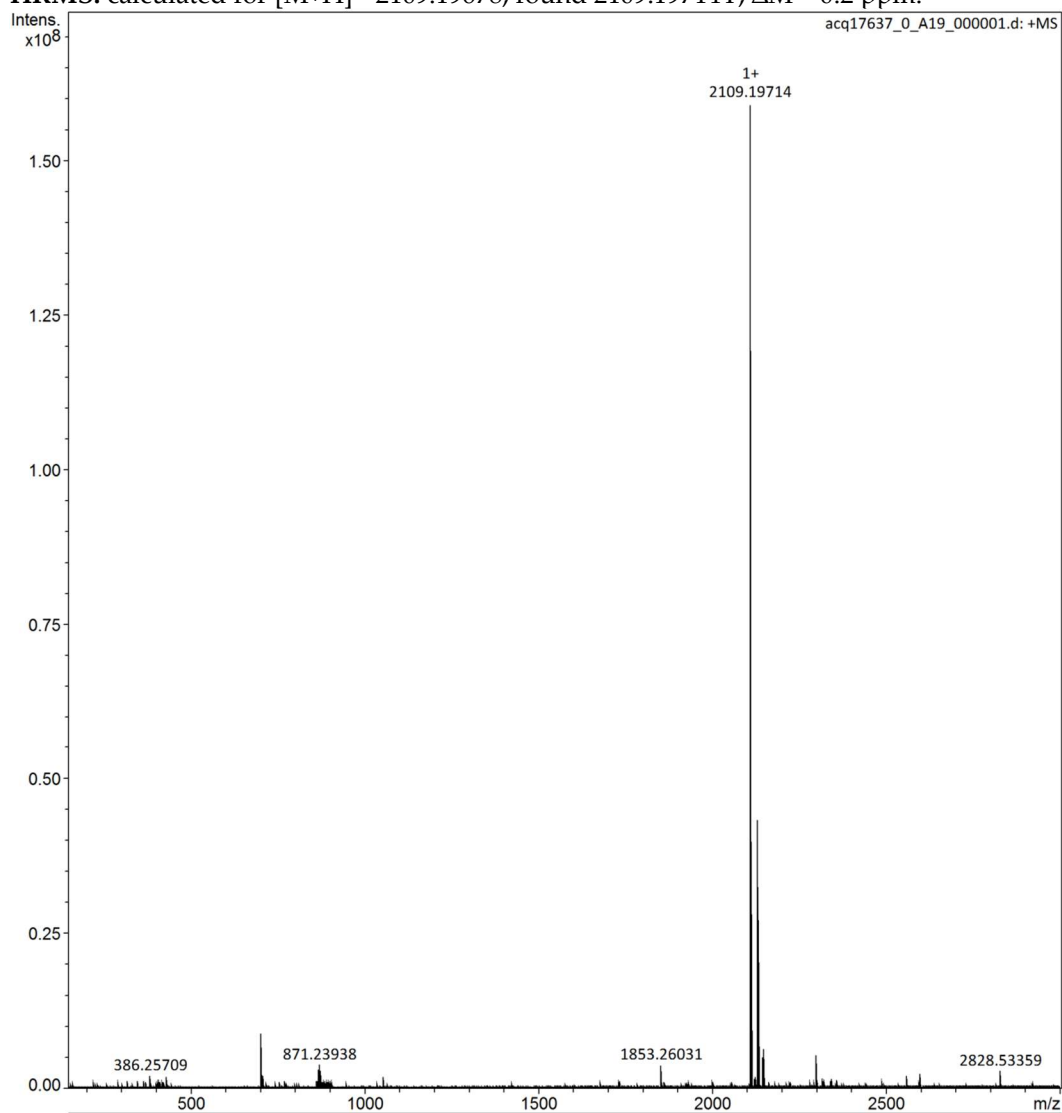

**HPLC:** Charge: +7.  $t_R = 6.579$  min, purity 99.368%. Gradient: 0–60% B during 10 min. B = 95% MeCN + 0.1% TFA.

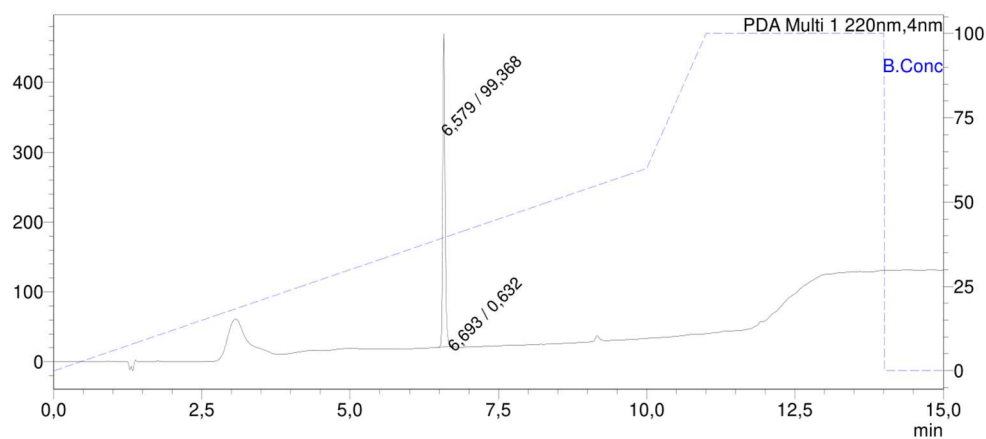

## Compound 4

**HRMS:** calculated for  $[M+H]^+$  2152.20260, found 2152.20369;  $\Delta M = 0.5$  ppm.

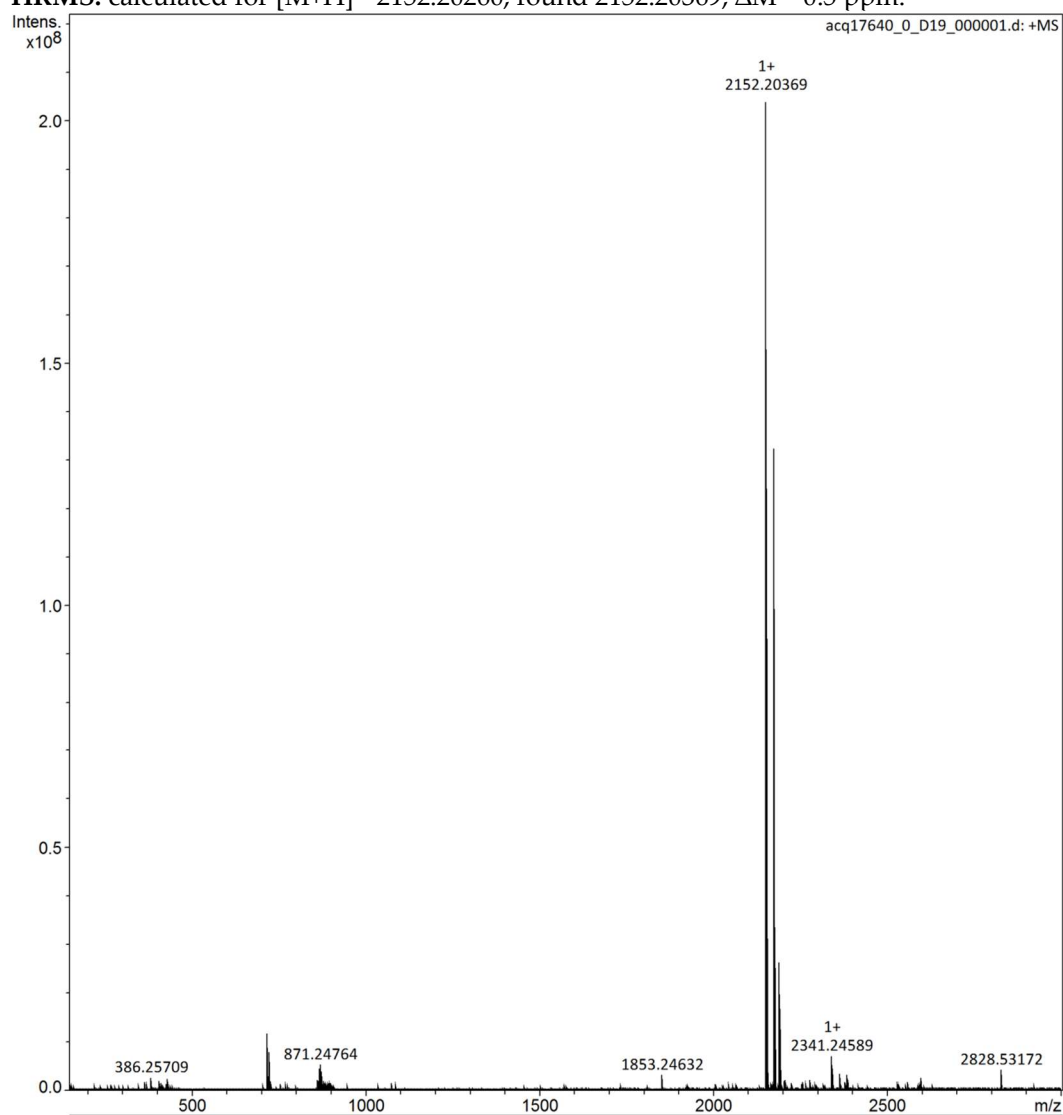

**HPLC:** Charge: +7.  $t_R = 6.514$  min, purity 99.670%. Gradient: 0-60% B during 10 min. B = 95% MeCN + 0.1% TFA.

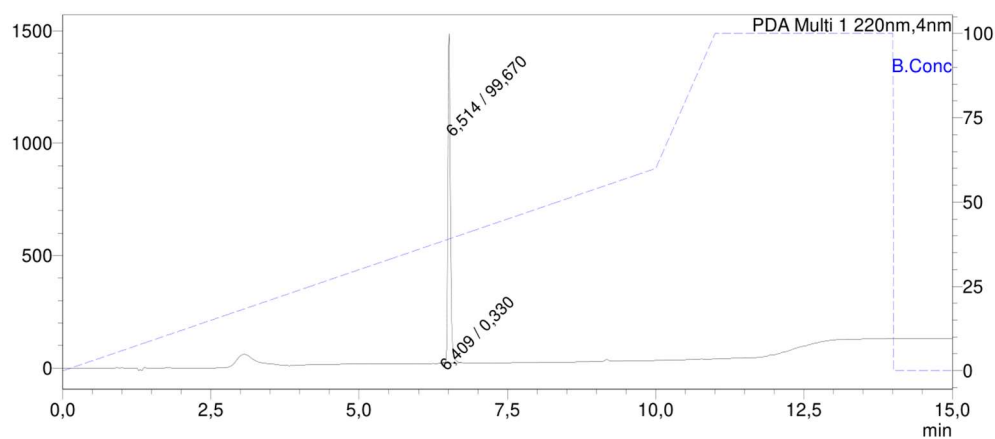

## Compound 5

**HRMS:** calculated for  $[M+H]^+$  2356.33876, found 2356.33774;  $\Delta M = 0.4$  ppm.

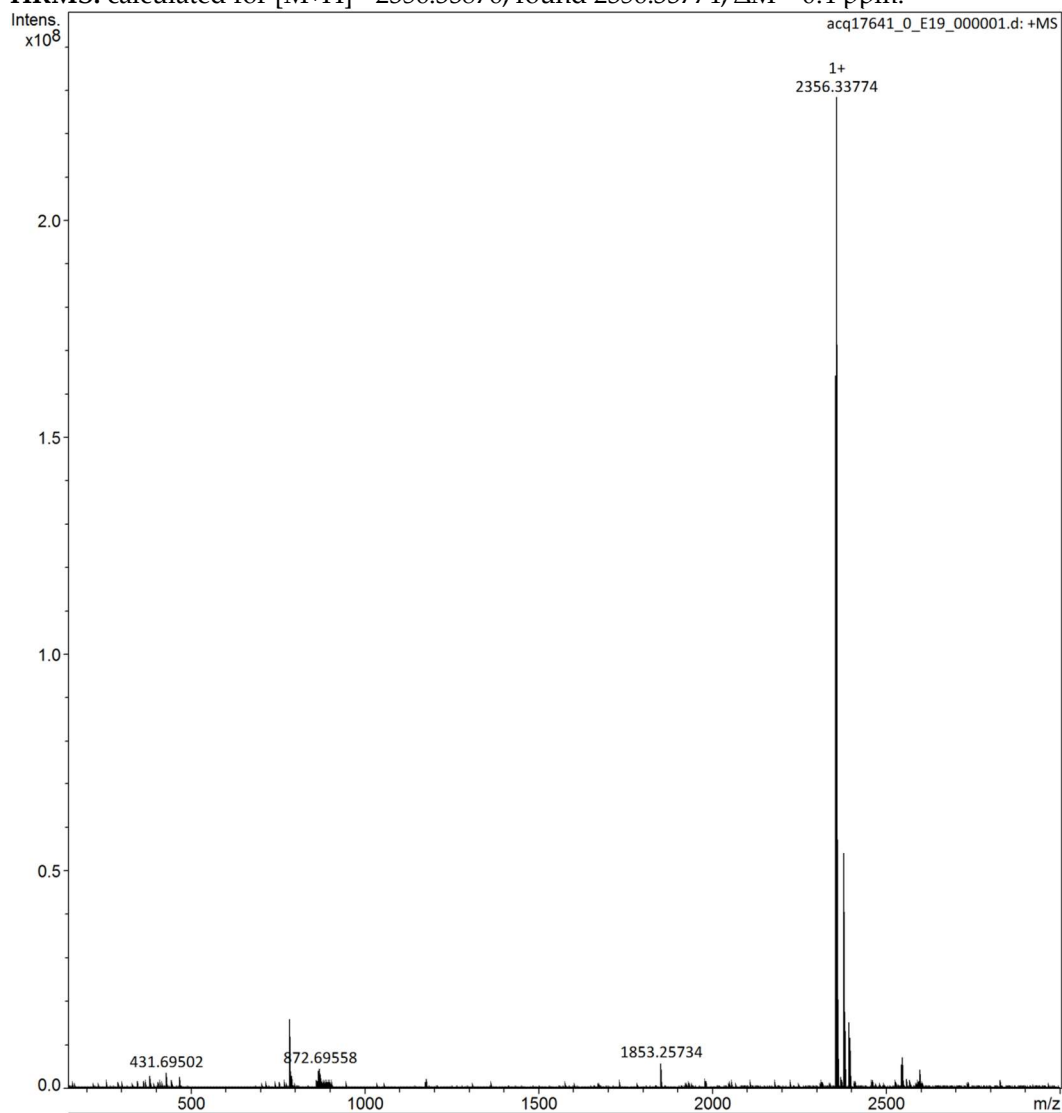

**HPLC:** Charge: +7.  $t_R = 6.638$  min, purity 98.112%. Gradient: 0-60% B during 10 min. B = 95% MeCN + 0.1% TFA.

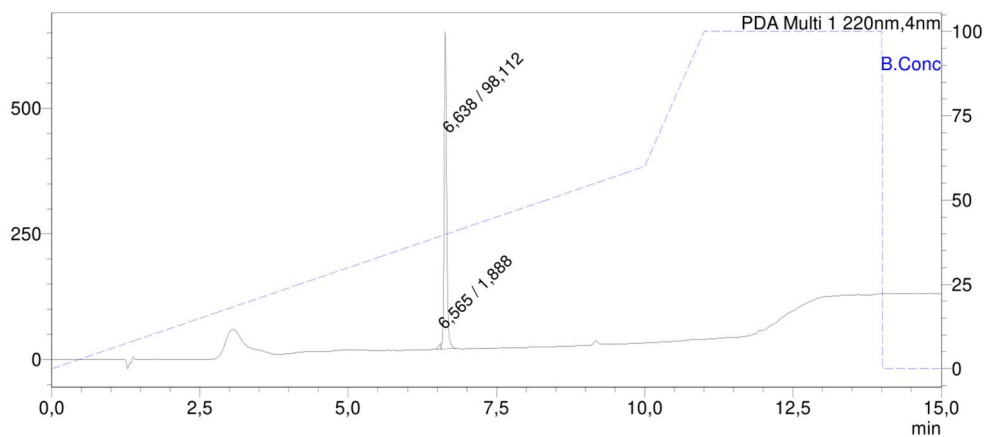



**Compound 6**

**HRMS:** calculated for  $[M+H]^+$  1963.10249, found 1963.10271;  $\Delta M = 0.1$  ppm.

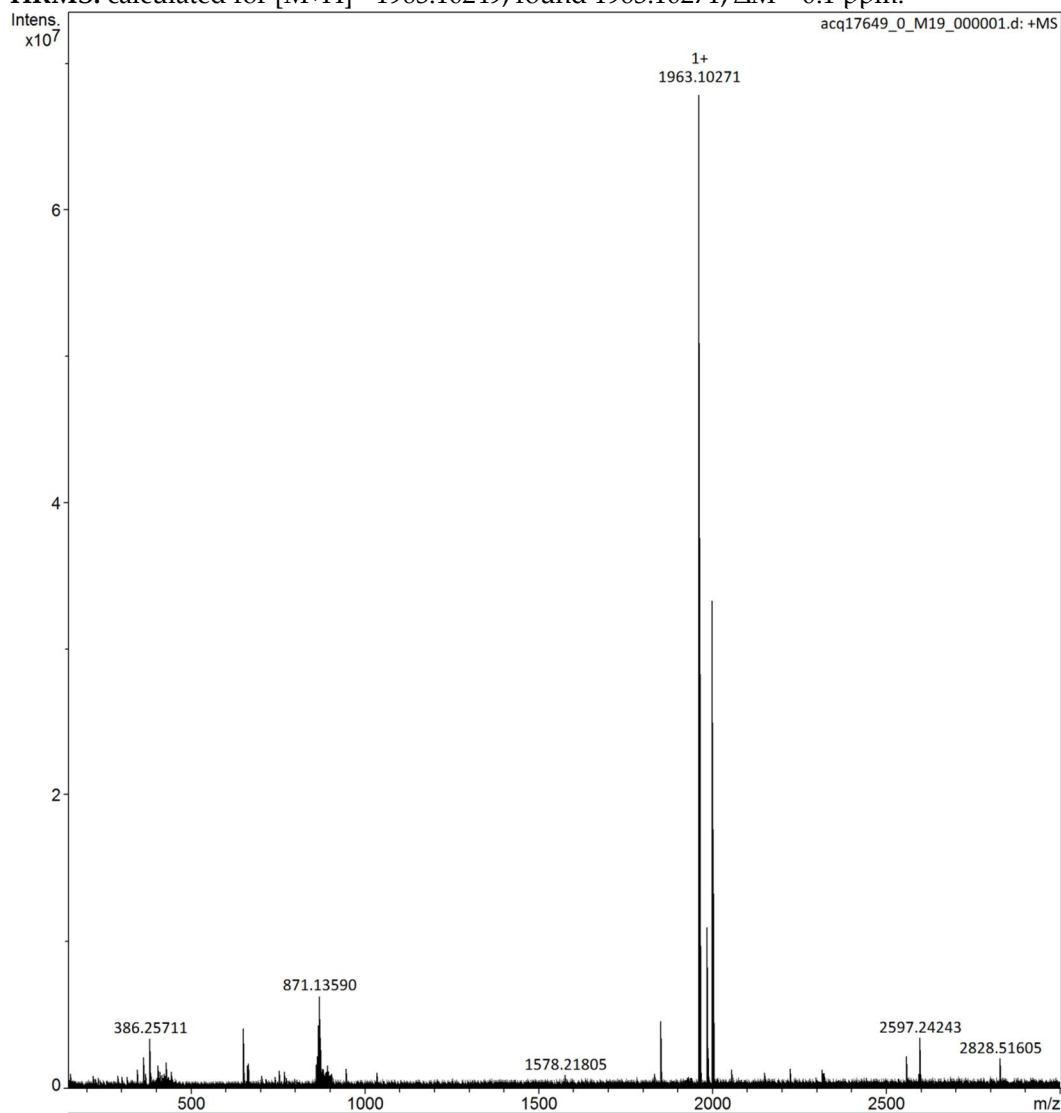

**HPLC:** Charge: +7.  $t_R = 6.505$  min, purity 98.327%. Gradient: 0–60% B during 10 min. B = 95% MeCN + 0.1% TFA.

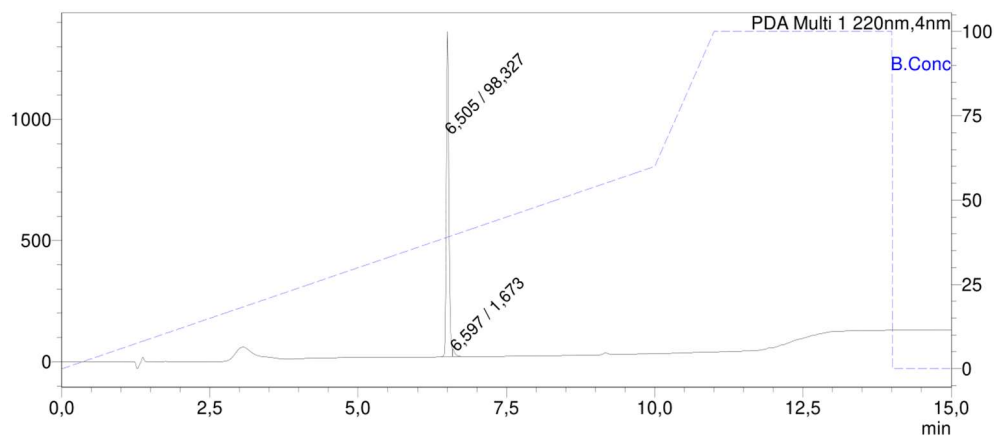

## Compound 7

**HRMS:** calculated for  $[M+H]^+$  2007.12870, found 2007.12950;  $\Delta M = 0.4$  ppm.

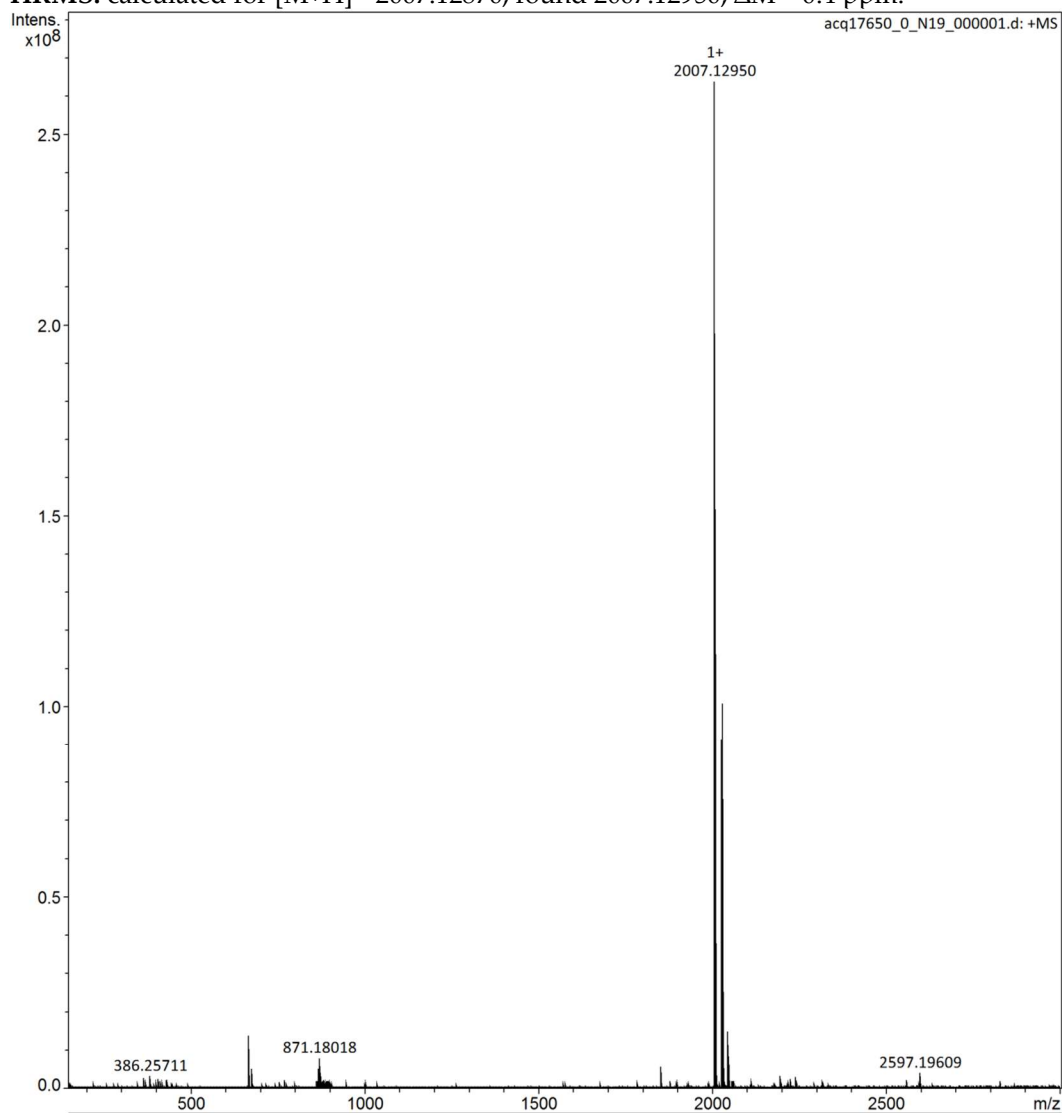

**HPLC:** Charge: +7.  $t_R = 6.528$  min, purity 98.548%. Gradient: 0–60% B during 10 min. B = 95% MeCN + 0.1% TFA.

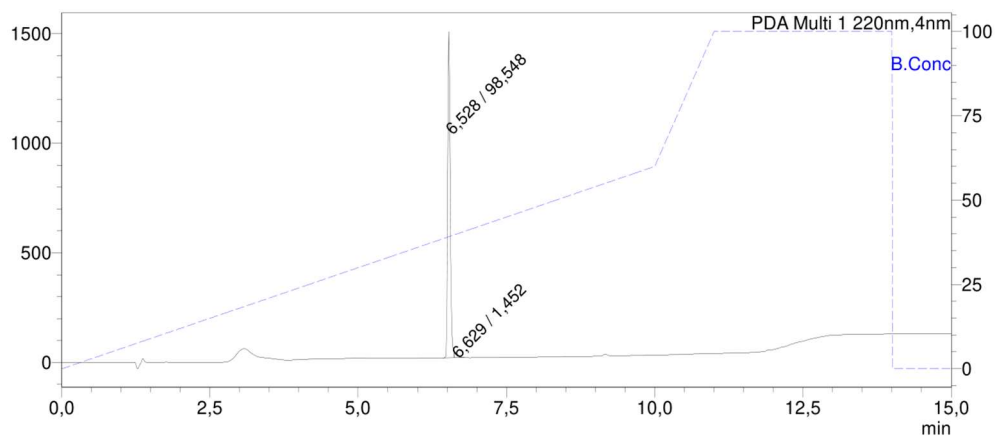

**Compound 8**

**HRMS:** calculated for  $[M+H]^+$  2051.15492, found 2051.15671;  $\Delta M = 0.9$  ppm.

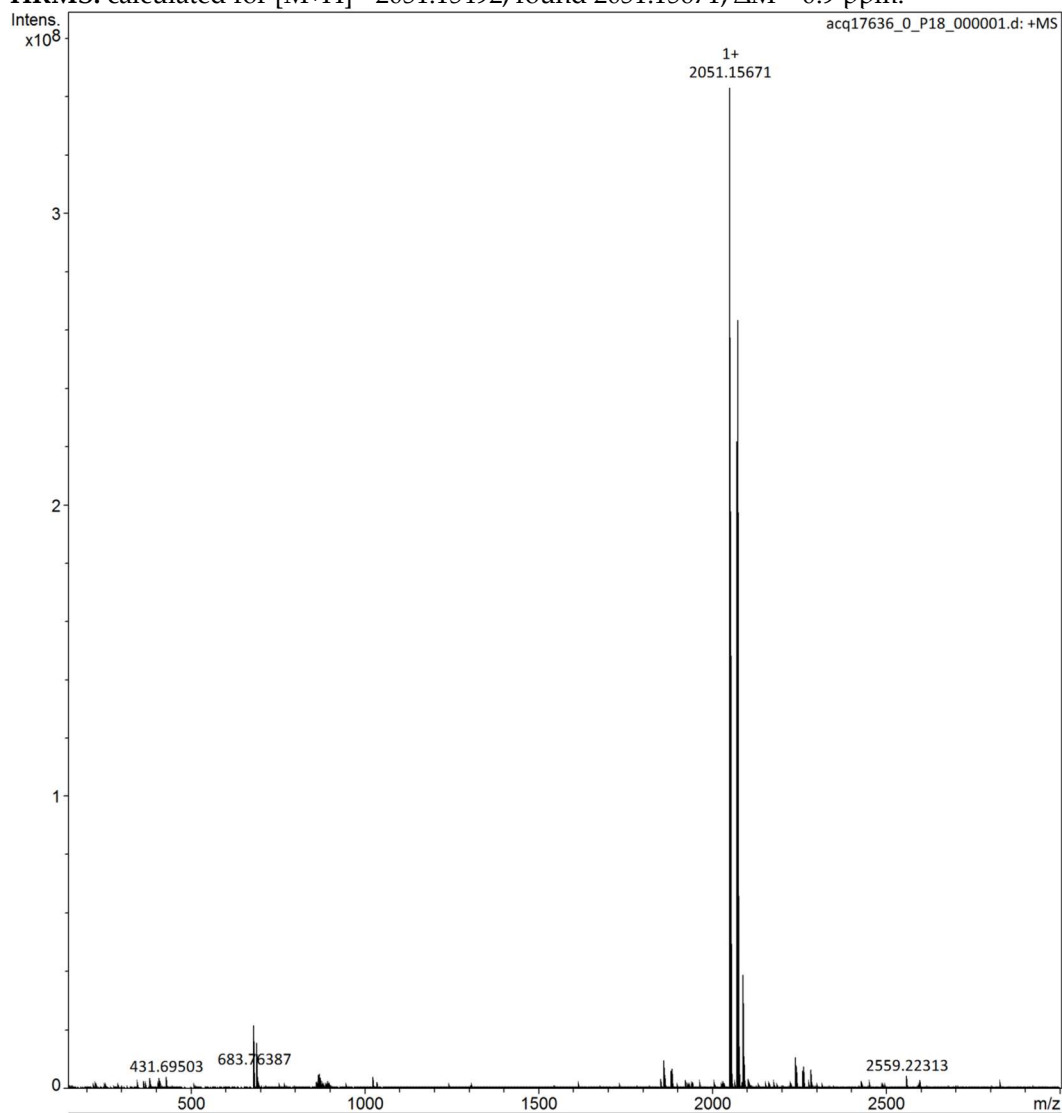

**HPLC:** Charge: +7.  $t_R = 6.569$  min, purity 99.294%. Gradient: 0-60% B during 10 min. B = 95% MeCN + 0.1% TFA.

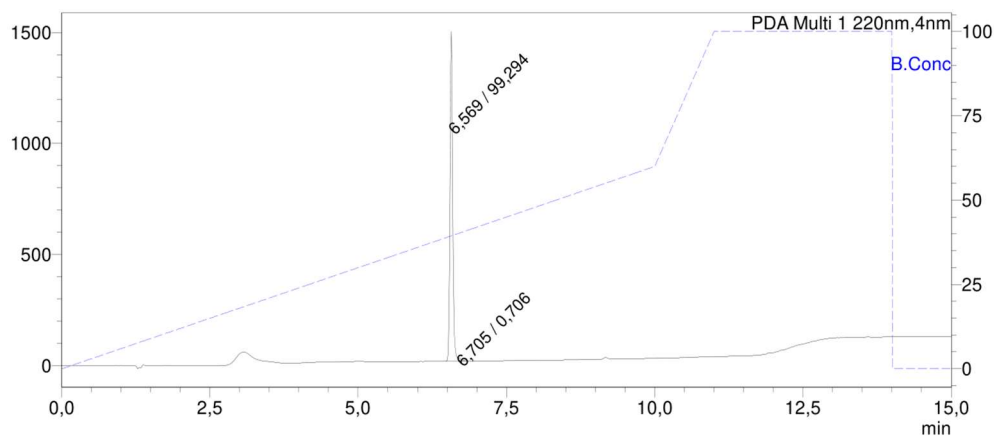

**Compound 9**

**HRMS:** calculated for  $[M+H]^+$  2109.19678, found 2109.19733;  $\Delta M = 0.3$  ppm.

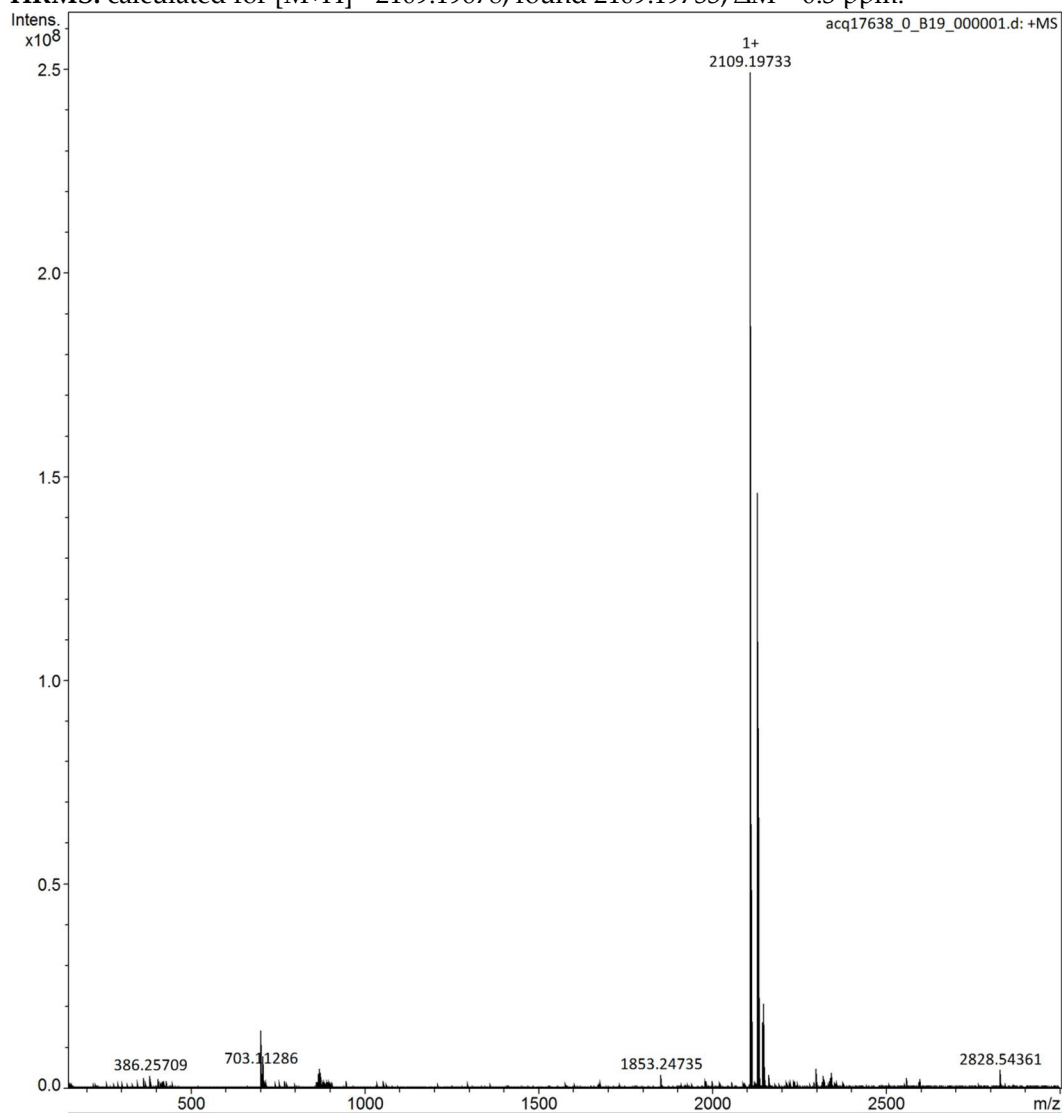

**HPLC:** Charge: +7.  $t_R = 6.588$  min, purity 99.198%. Gradient: 0–60% B during 10 min. B = 95% MeCN + 0.1% TFA.

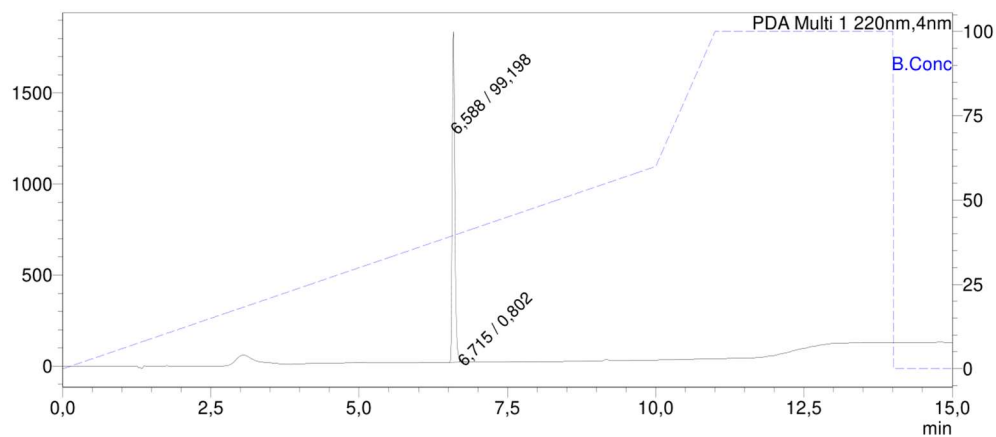

**Compound 10**

**HRMS:** calculated for  $[M+H]^+$  2197.24921, found 2197.25033;  $\Delta M = 0.5$  ppm.

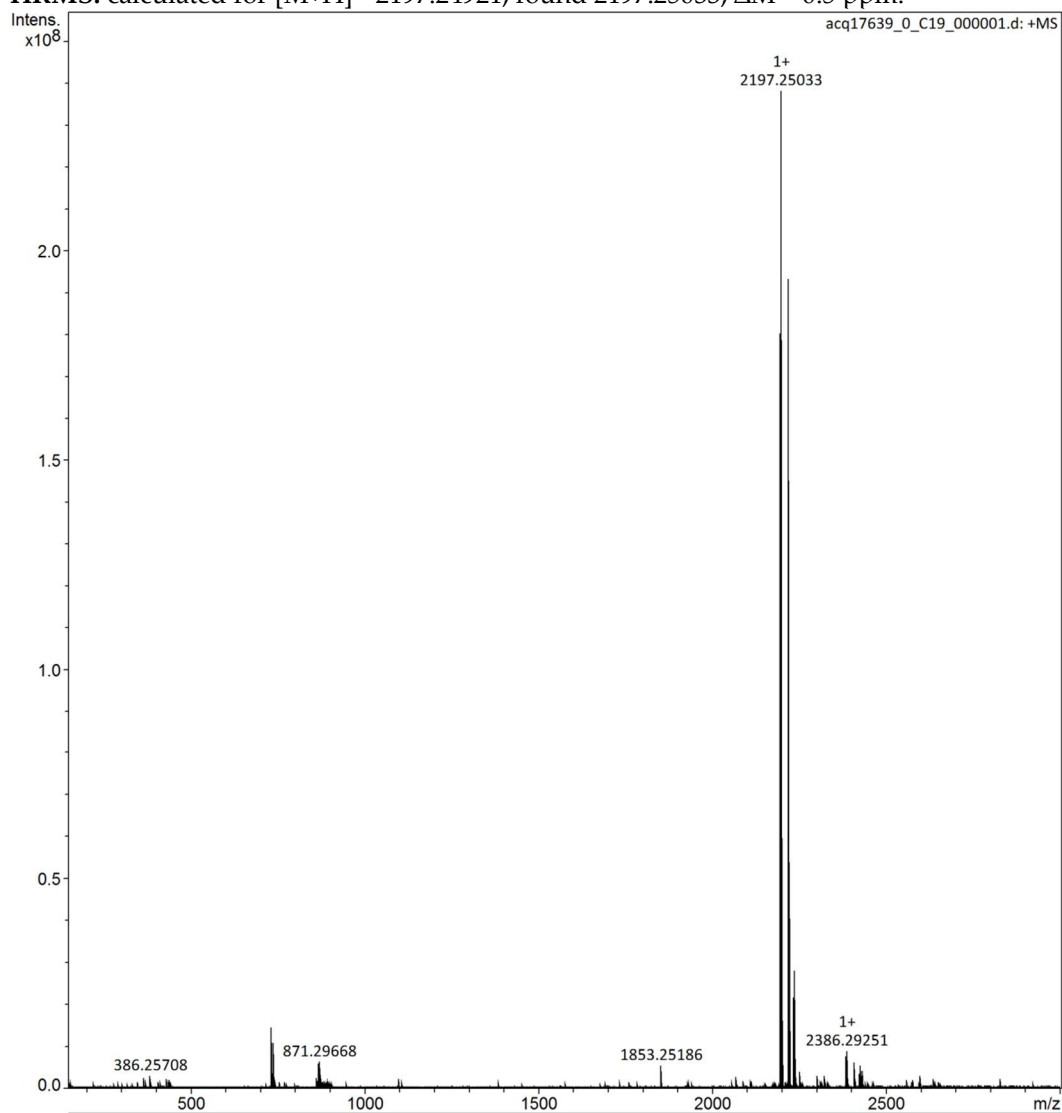

**HPLC:** Charge: +7.  $t_R = 6.664$  min, purity 99.251%. Gradient: 0–60% B during 10 min. B = 95% MeCN + 0.1% TFA.

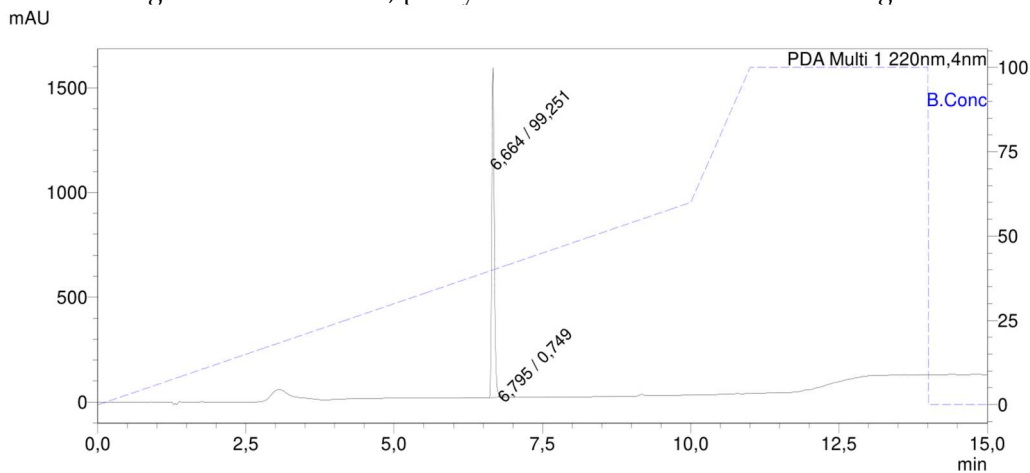

**Compound 11**

**HRMS:** calculated for  $[M+H]^+$  2165.19785, found 2165.19755;  $\Delta M = 0.1$  ppm.

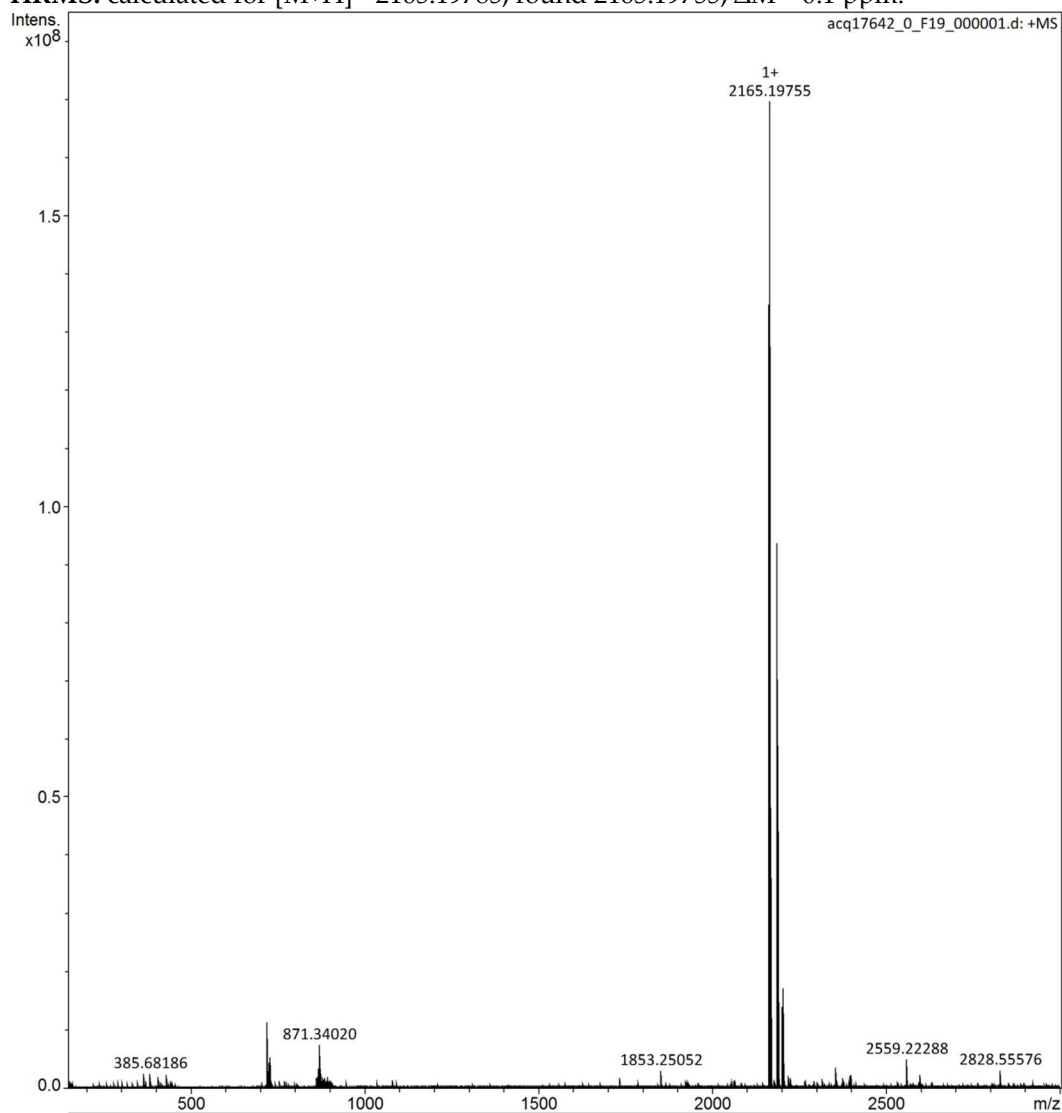

**HPLC:** Charge: +7.  $t_R = 6.422$  min, purity 100.000%. Gradient: 0-60% B during 10 min. B = 95% MeCN + 0.1% TFA.

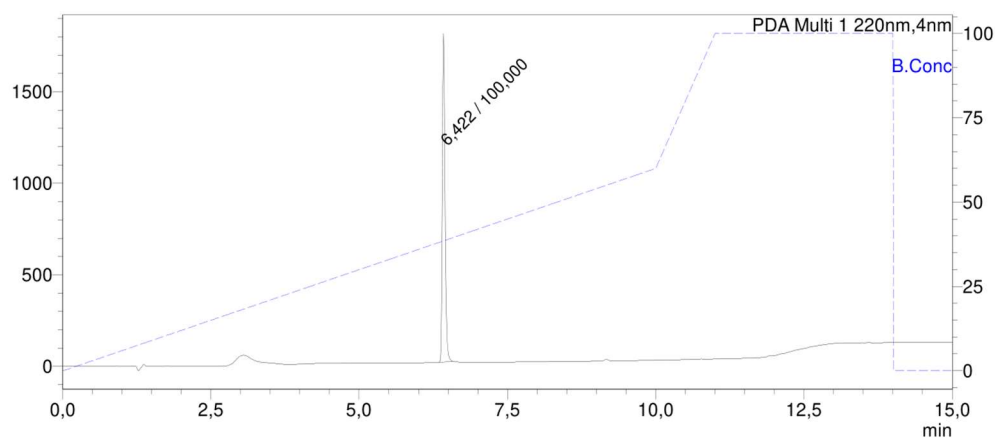

**Compound 12**

**HRMS:** calculated for  $[M+H]^+$  2297.27649, found 2297.27721;  $\Delta M = 0.3$  ppm.

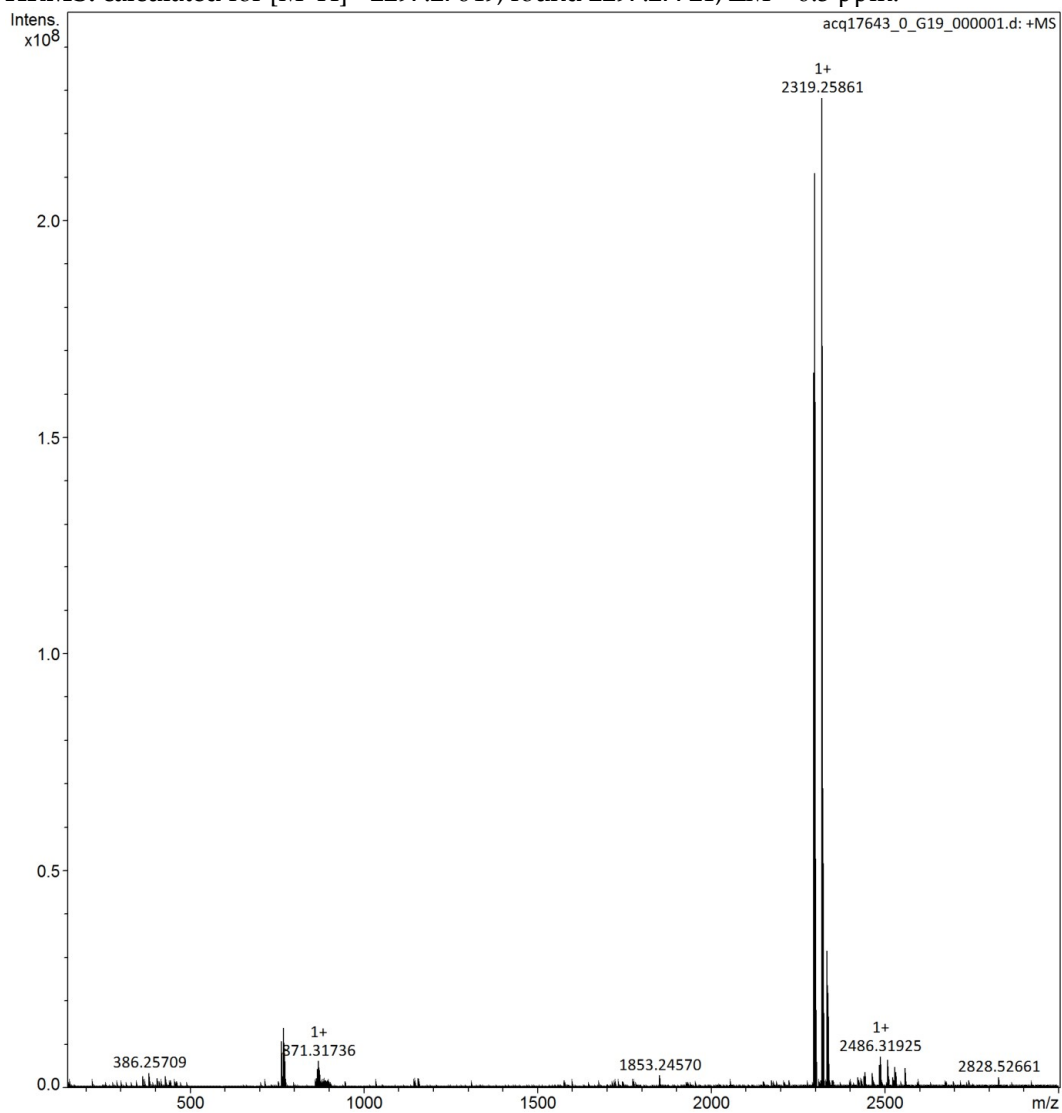

**HPLC:** Charge: +7.  $t_R = 6.504$  min, purity 100.000%. Gradient: 0-60% B during 10 min. B = 95% MeCN + 0.1% TFA.

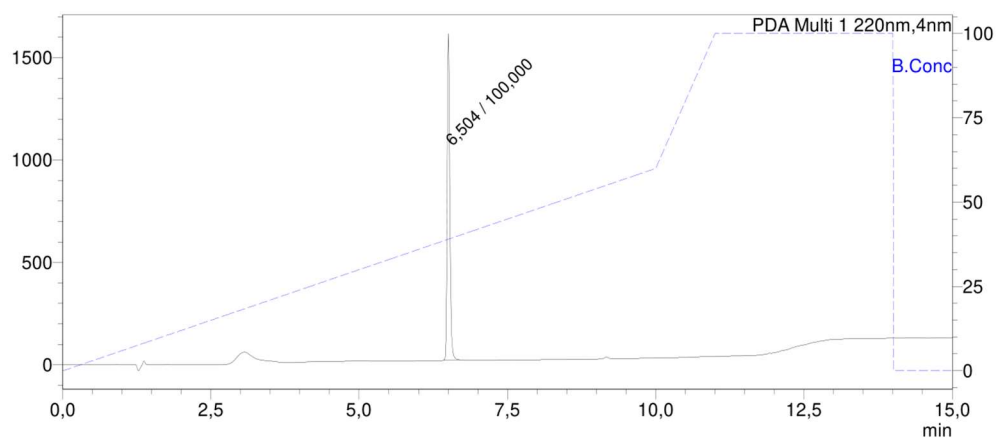

**Compound 13**

**HRMS:** calculated for  $[M+H]^+$  2429.35514, found 2429.35620;  $\Delta M = 0.4$  ppm.

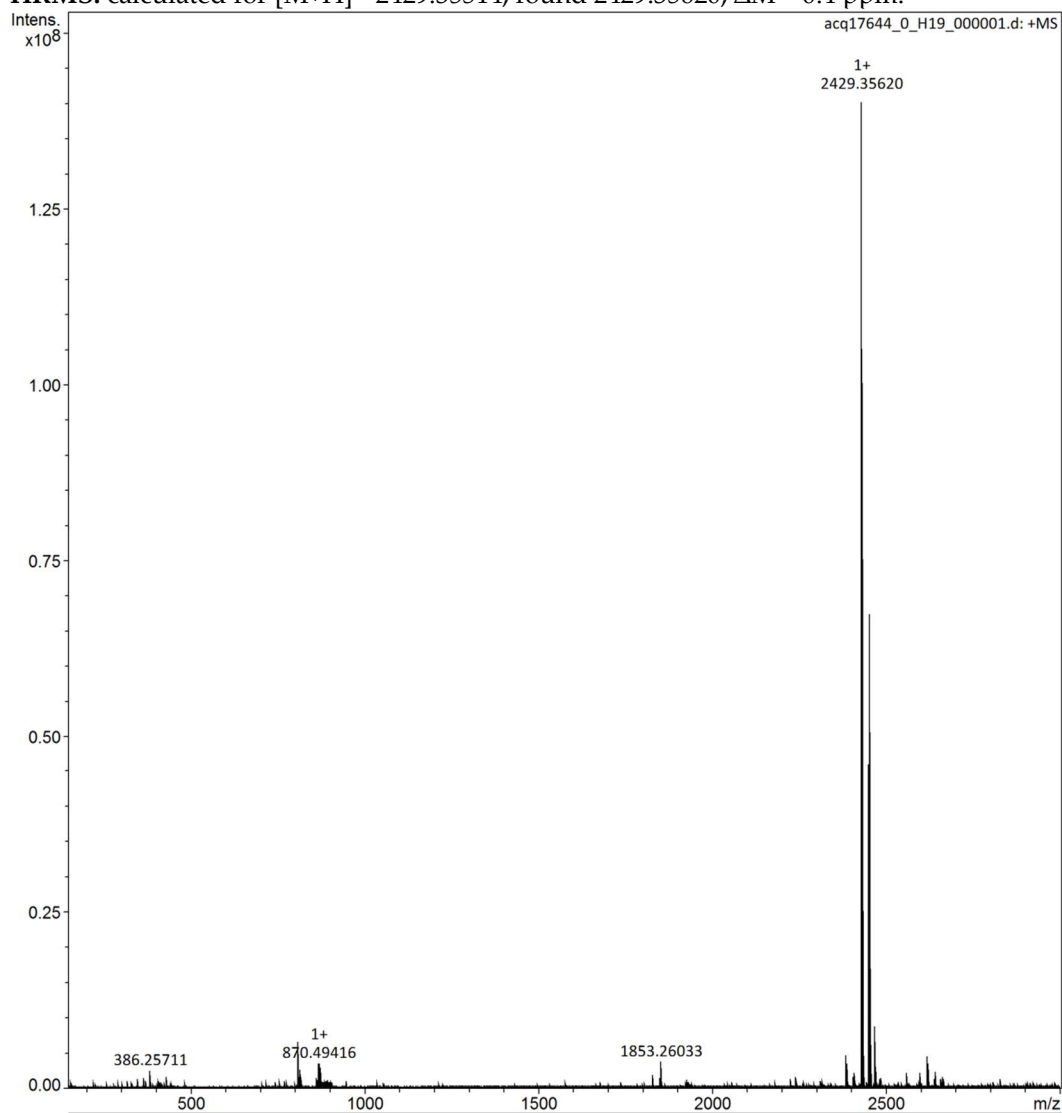

**HPLC:** Charge: +7.  $t_R = 6.600$  min, purity 98.906%. Gradient: 0-60% B during 10 min. B = 95% MeCN + 0.1% TFA.

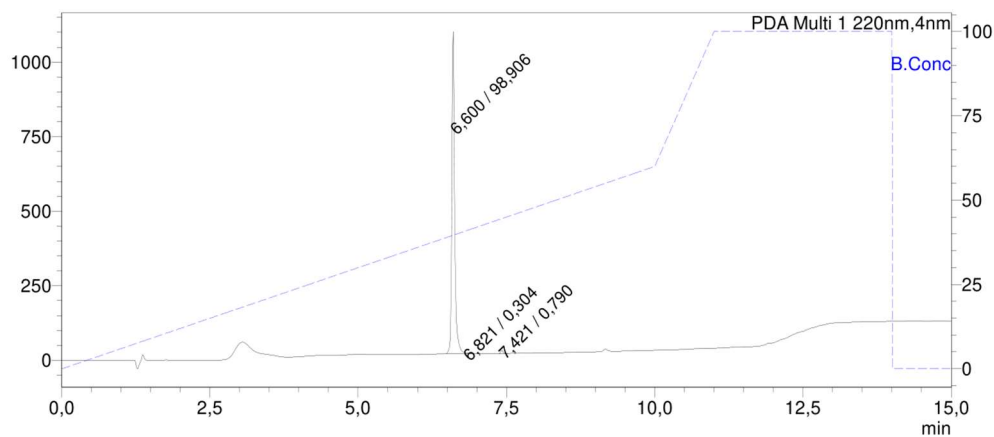



**Compound 14**

**HRMS:** calculated for  $[M+H]^+$  2603.48073, found 2603.47676;  $\Delta M = 1.5$  ppm.

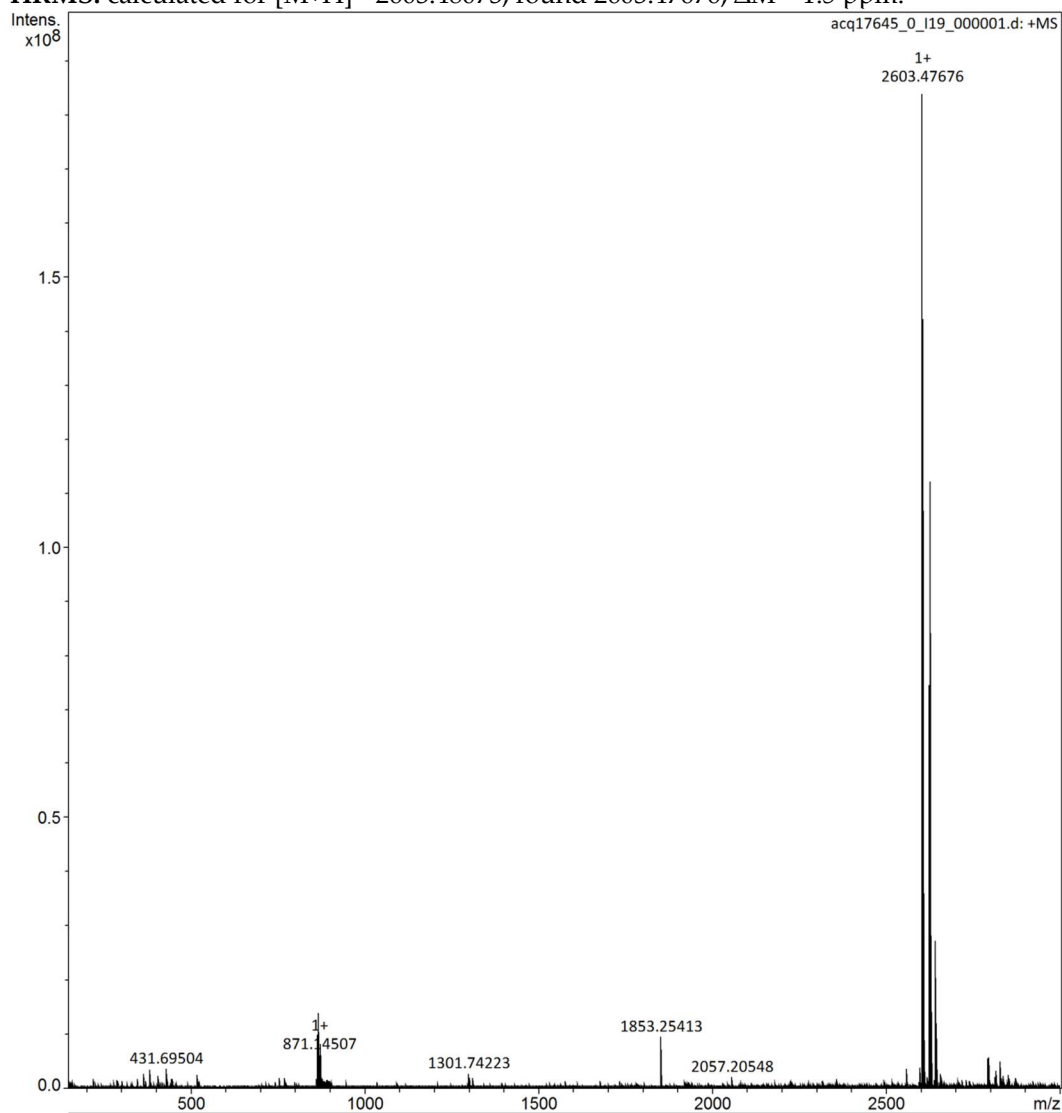

**HPLC:** Charge: +7.  $t_R = 6.679$  min, purity 100.000%. Gradient: 0-60% B during 10 min. B = 95% MeCN + 0.1% TFA.

mAU

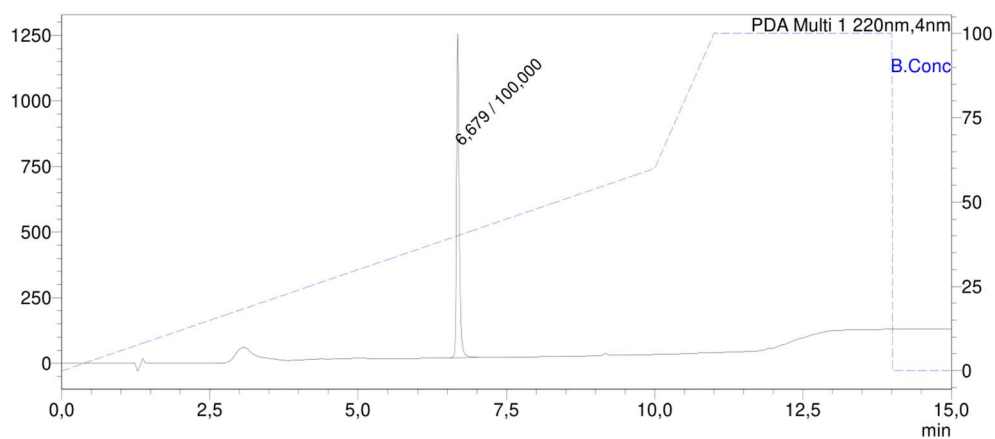

**Compound 15**

**HRMS:** calculated for  $[M+H]^+$  2064.15017, found 2064.15027;  $\Delta M = 0.0$  ppm.

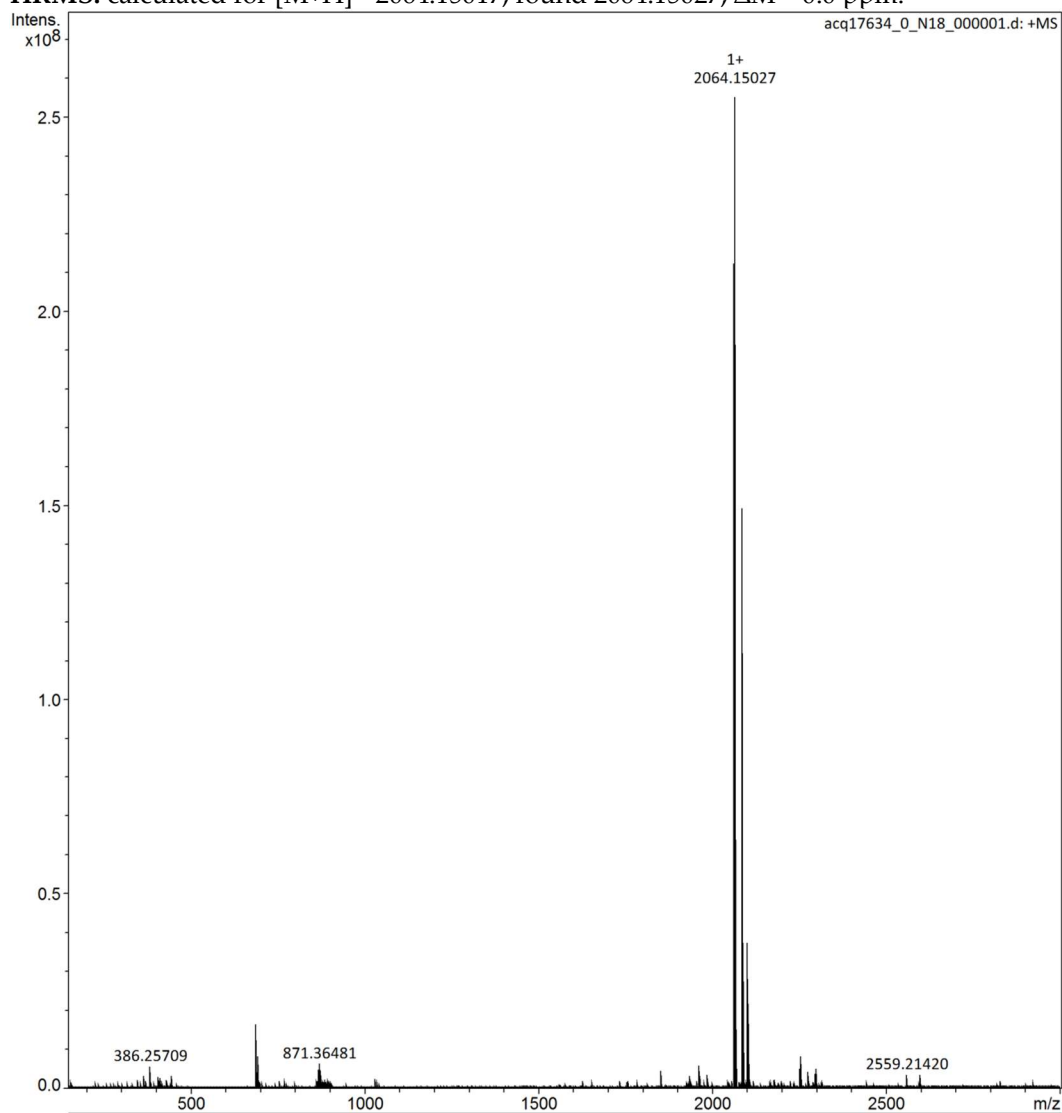

**HPLC:** Charge: +7.  $t_R = 6.460$  min, purity 97.165%. Gradient: 0–60% B during 10 min. B = 95% MeCN + 0.1% TFA.

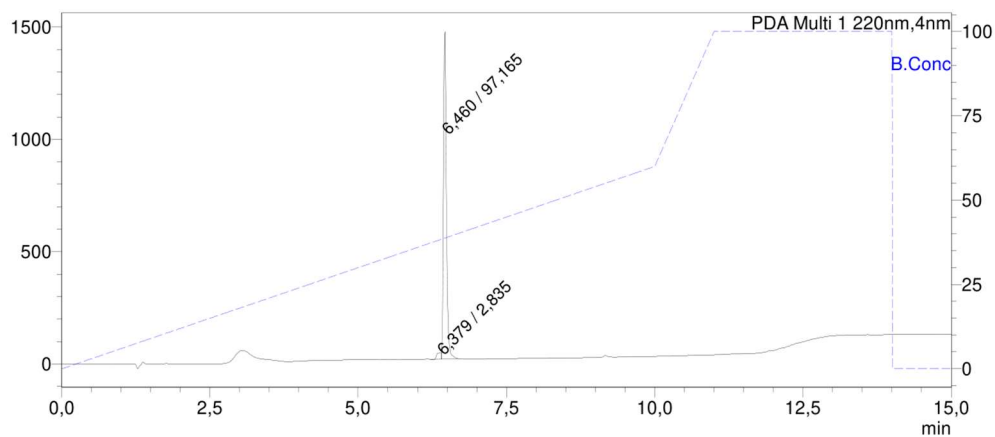

**Compound 16**

**HRMS:** calculated for  $[M+H]^+$  2152.20260, found 2152.20225;  $\Delta M = 0.2$  ppm.

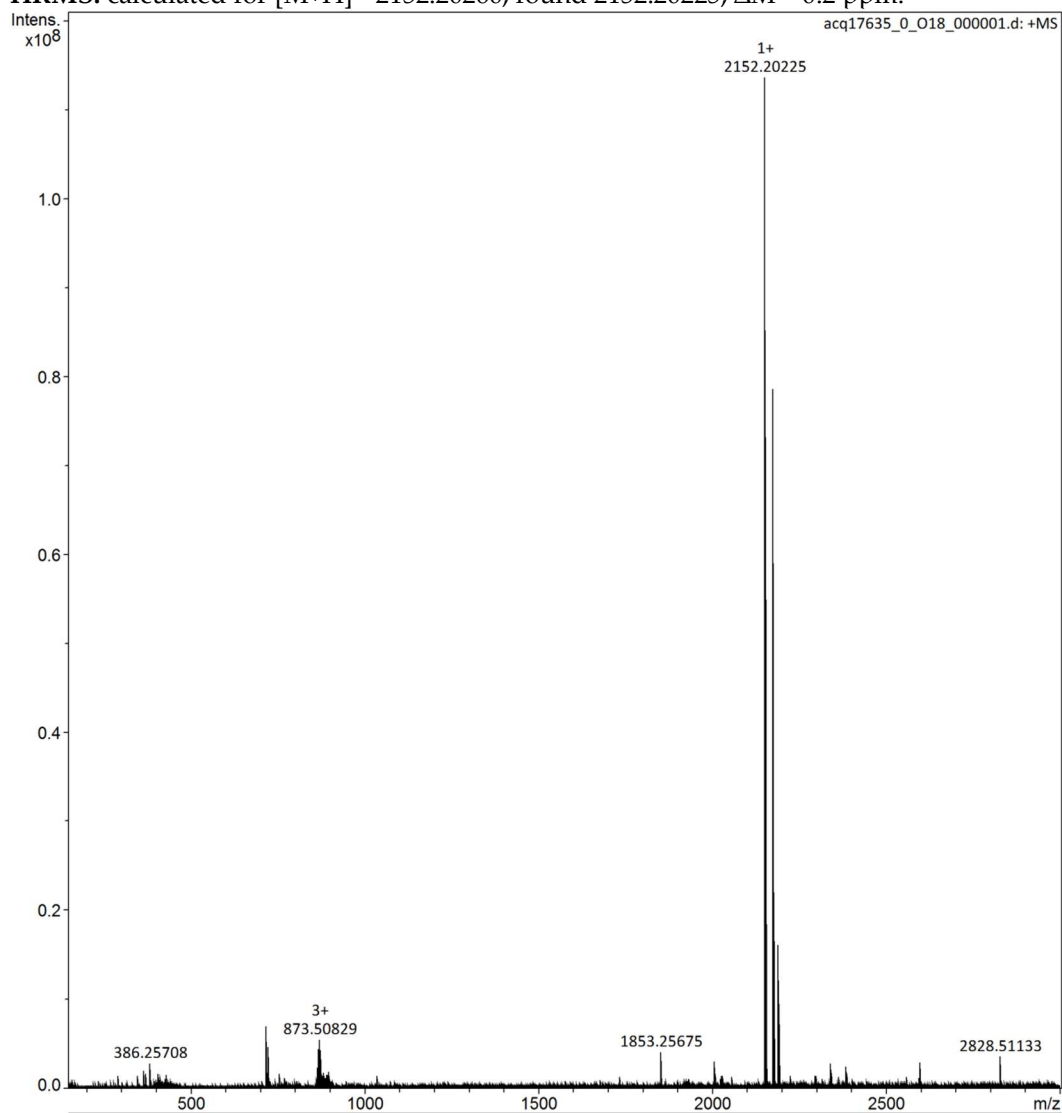

**HPLC:** Charge: +7.  $t_R = 6.521$  min, purity 97.108%. Gradient: 0–60% B during 10 min. B = 95% MeCN + 0.1% TFA.

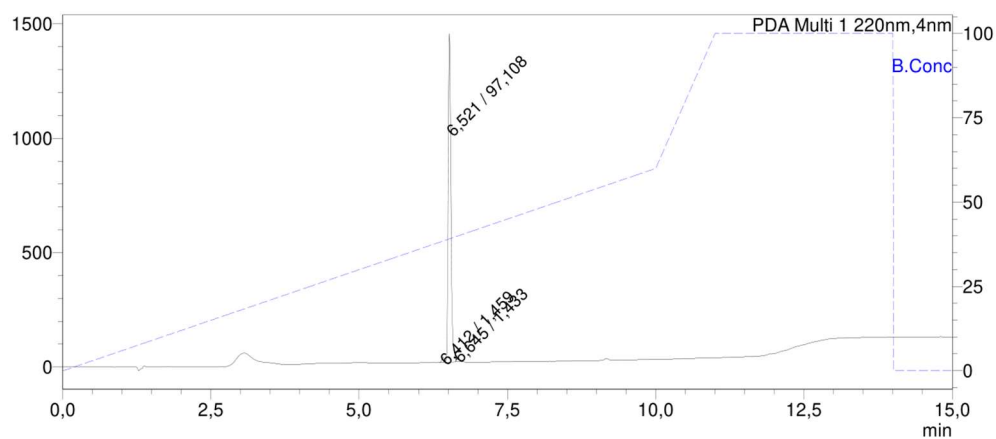

**Compound 17**

**HRMS:** calculated for  $[M+H]^+$  2240.25503, found 2240.25527;  $\Delta M = 0.1$  ppm.

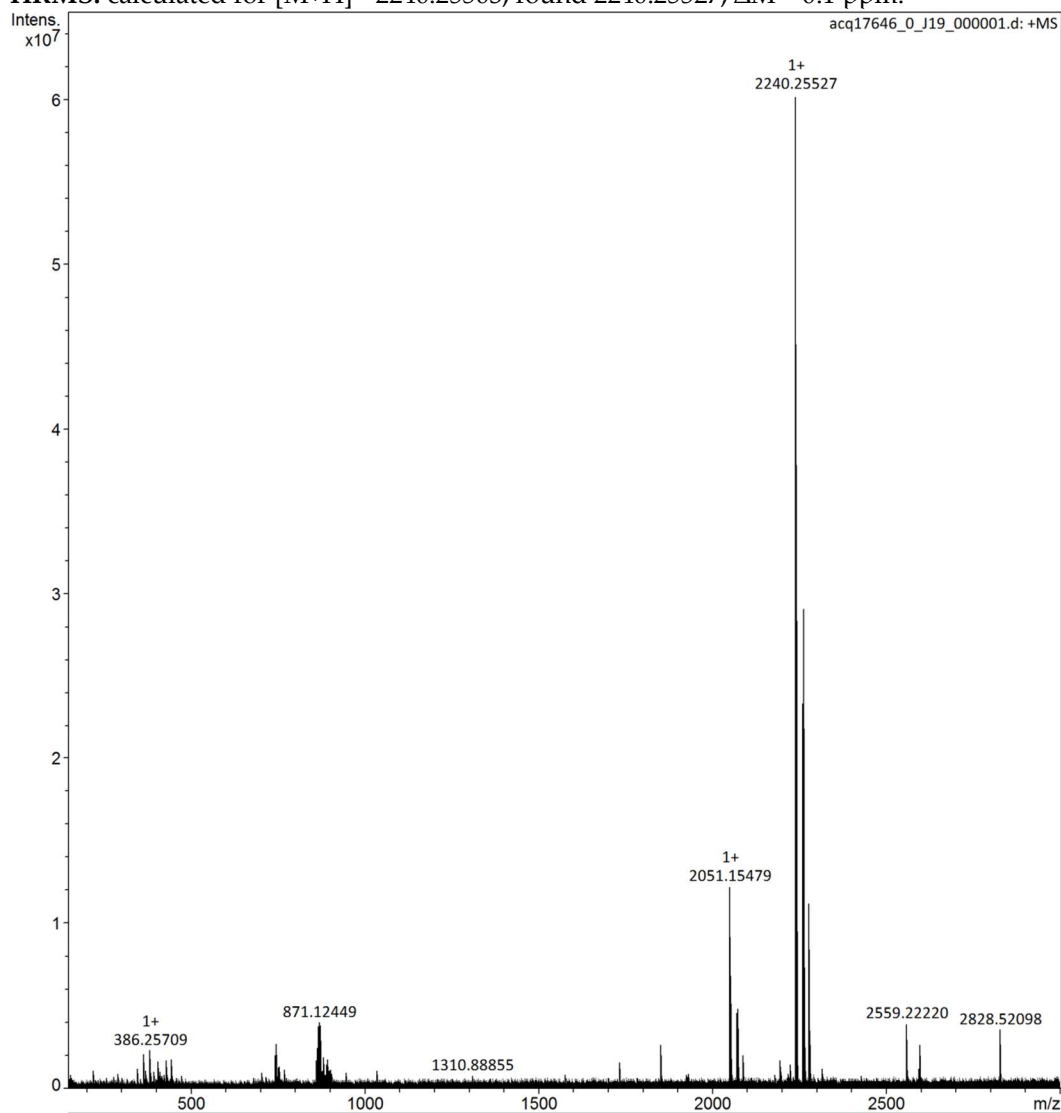

**HPLC:** Charge: +7.  $t_R = 6.587$  min, purity 100.000%. Gradient: 0–60% B during 10 min. B = 95% MeCN + 0.1% TFA.

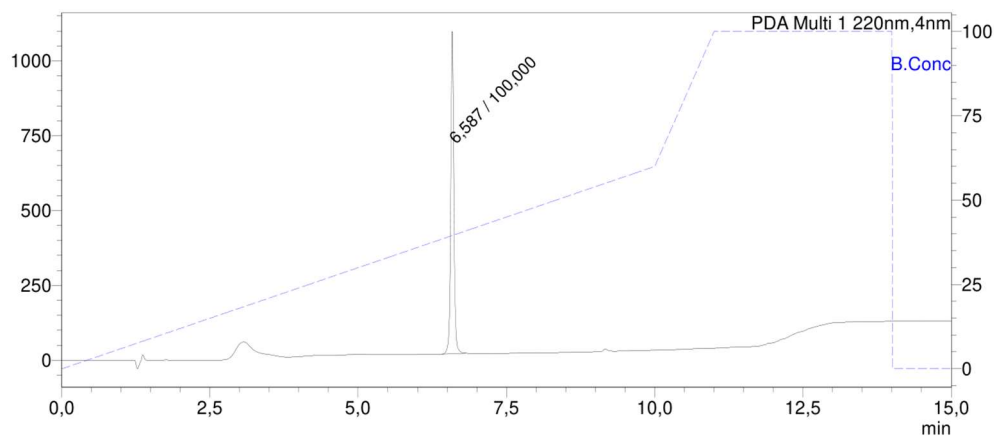

**Compound 18****HRMS:** calculated for  $[M+H]^+$  2356.33876, found 2356.33810;  $\Delta M = 0.3$  ppm.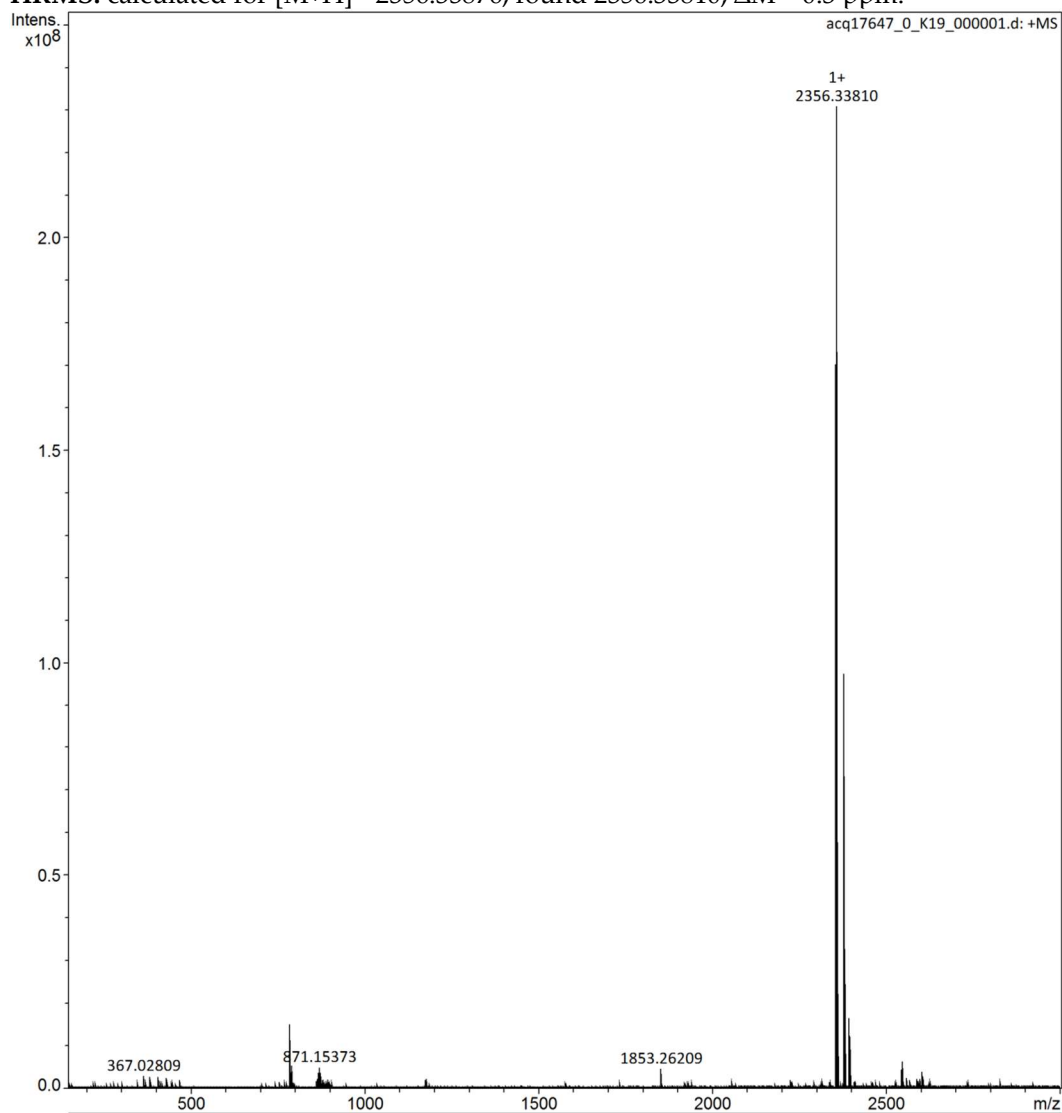**HPLC:** Charge: +7.  $t_R = 6.631$  min, purity 100.000%. Gradient: 0-60% B during 10 min. B = 95% MeCN + 0.1% TFA.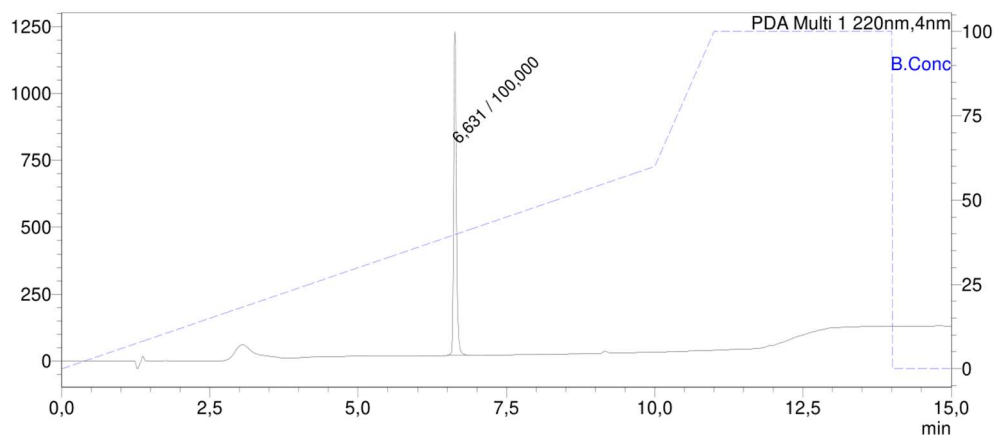

**HepG2 IC<sub>50</sub> curves**

Curves only drawn for compounds displaying IC<sub>50</sub> < 1280 µg/mL, i.e., 1, 6-10, 12, 14-16.

**Compound 1**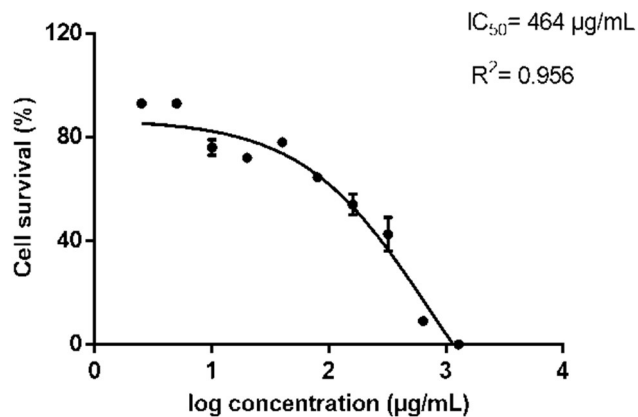**Compound 6**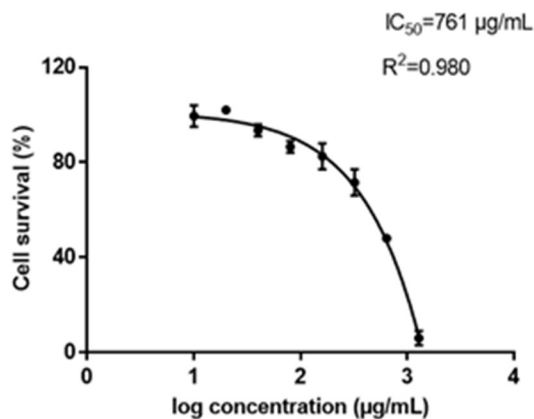**Compound 7**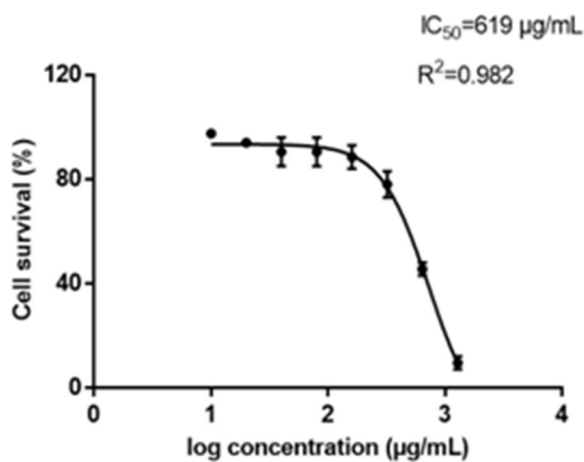**Compound 8**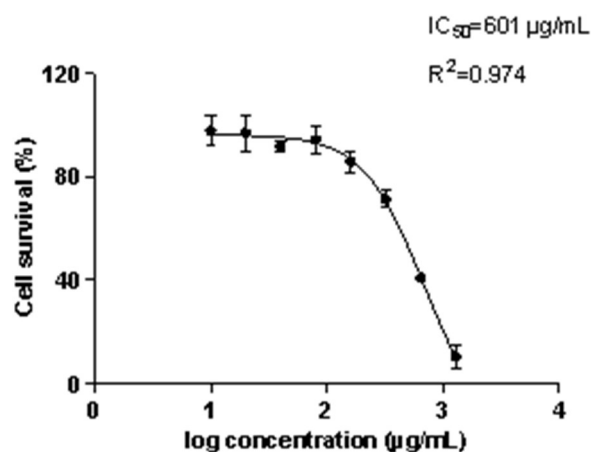**Compound 9**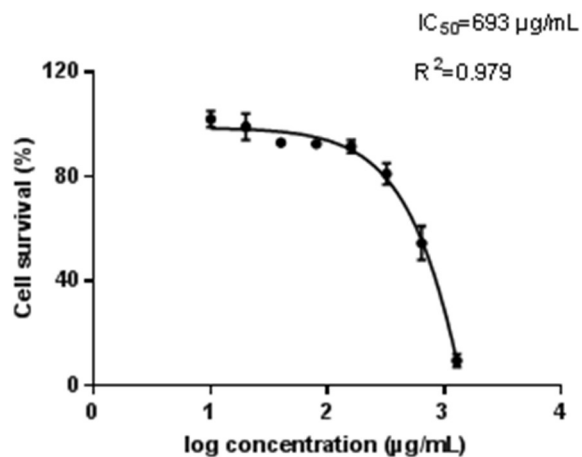**Compound 10**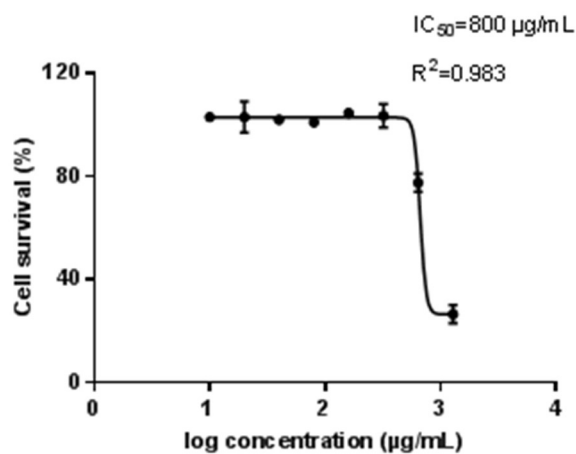

Compound 12

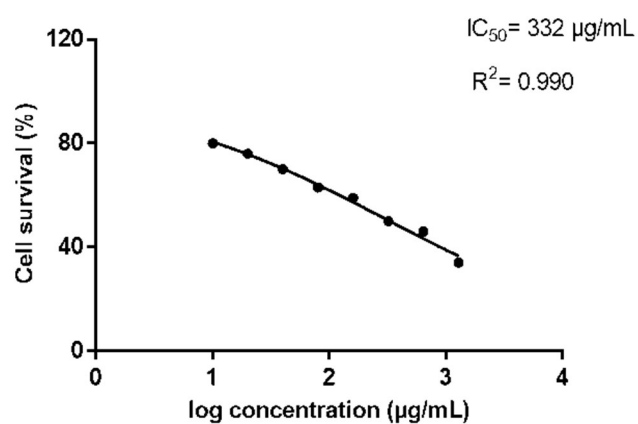

Compound 14

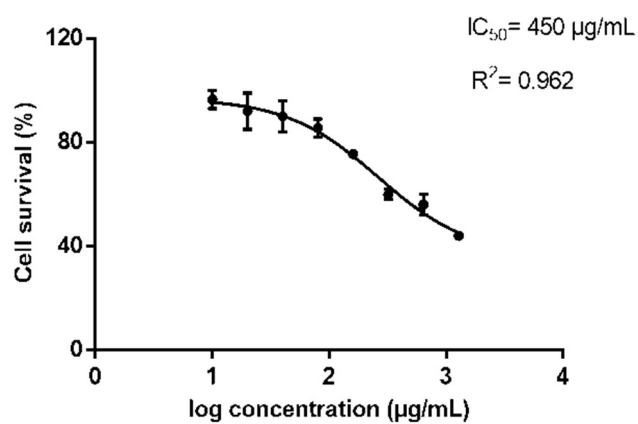

Compound 15

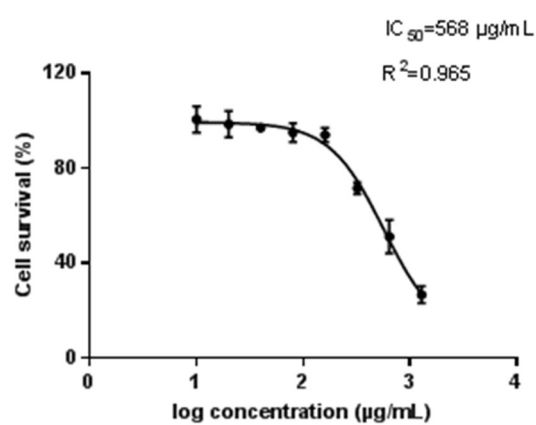

Compound 16

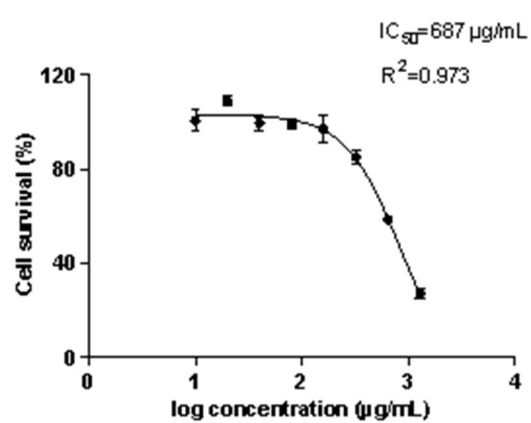

Supplement: s1 [file s1]
